# Supplementary material for: Common gene-network signature of different neurological disorders and their potential implications to neuroAIDS
Source: PLoS One. 2017 Aug 8;12(8):e0181642. doi: 10.1371/journal.pone.0181642 (PMC5549695; doi:10.1371/journal.pone.0181642)
Supplement: S1 Data — Shared neighboring genes between AIDS and different neurological disorders. (XLSX) [file pone.0181642.s004.xlsx]

## Sheet: Age macular degeneration & HIV
Shared neighboring genes between AIDS and Age Macular Degeneration
ADAM10	1
ADM	1
AGRP	1
AGT	1
AIMP1	1
AKT1	1
ANGPT1	1
ANGPT2	1
APCS	1
APOE	1
APP	1
BAX	1
BCL2L1	1
BMP2	1
BMP4	1
BMP5	1
BPI	1
BRCA1	1
C4BPA	1
C5	1
CCL11	1
CCL17	1
CCL2	1
CCL20	1
CCL21	1
CD14	1
CD3E	1
CD40	1
CD40LG	1
CD44	1
CD69	1
CD80	1
CDK12	1
CFLAR	1
CHGB	1
DDX17	1
DDX20	1
DDX23	1
DDX24	1
DDX43	1
DDX5	1
DLK1	1
EBI3	1
ECE1	1
EDA2R	1
EDN1	1
EFNA1	1
EFTUD2	1
EGF	1
EGFR	1
EGR1	1
ELANE	1
ELAVL1	1
ENPEP	1
EPO	1
ERCC2	1
ESR2	1
ETS1	1
ETS2	1
EXOSC10	1
EXOSC5	1
EXOSC9	1
FADD	1
FAS	1
FASLG	1
FBN1	1
FGF1	1
FGF2	1
FGF7	1
FGL2	1
FLT1	1
FLT3LG	1
FOS	1
FOSL1	1
FSTL1	1
GDF10	1
GHRH	1
GHRL	1
GRB2	1
GRN	1
HGF	1
HIF1A	1
HMOX1	1
HNRPLL	1
HSP90B1	1
HTT	1
ICAM1	1
ICAM2	1
IFNB1	1
IFNG	1
IGF1	1
IGFBP1	1
IGFBP2	1
IHH	1
IKBKB	1
IL10	1
IL11	1
IL12B	1
IL15	1
IL17A	1
IL17F	1
IL18	1
IL18BP	1
IL1A	1
IL1B	1
IL1R1	1
IL2	1
IL24	1
IL26	1
IL2RA	1
IL2RG	1
IL4	1
IL5	1
IL6	1
IL6R	1
IL7	1
IL8	1
INS	1
IRAK1	1
ITGA5	1
ITGB1	1
ITGB2	1
JAG1	1
JAK2	1
JUN	1
KITLG	1
LBP	1
LCK	1
LDLR	1
LEP	1
LIF	1
LIPE	1
LPL	1
LRPAP1	1
LSM2	1
LTA	1
LTBP2	1
LTBP4	1
LTK	1
MAP2K1	1
MAPK1	1
MAPK3	1
MBTPS1	1
MCL1	1
MIF	1
MMP10	1
MMP12	1
MMP13	1
MMP14	1
MMP17	1
MMP2	1
MMP3	1
MMP7	1
MMP8	1
MPDZ	1
MYC	1
MYD88	1
NFATC1	1
NFATC2	1
NFATC3	1
NFKBIA	1
NFX1	1
NGF	1
NHP2L1	1
NOS2	1
NOS3	1
NOV	1
NPY	1
NRG1	1
OSM	1
PAPPA	1
PARD6A	1
PARD6B	1
PDGFA	1
PF4	1
PIAS1	1
PLAU	1
PLG	1
PMCH	1
PML	1
POMC	1
POU2F1	1
PRL	1
PROC	1
PROK1	1
PRPF4	1
PRPF4B	1
PRPF8	1
PSEN1	1
PTGS1	1
PTGS2	1
PTHLH	1
PTK2	1
PTX3	1
PUF60	1
RBM8A	1
RAC1	1
REN	1
RIPK1	1
RNPS1	1
RUNX2	1
SELE	1
SELL	1
SERPINE1	1
SF3A1	1
SF3B4	1
SKIV2L2	1
SLURP1	1
SMAD6	1
SP1	1
SST	1
STAT1	1
STAT3	1
SUMO1	1
SYT1	1
TAC3	1
TAP1	1
TBP	1
TGFA	1
TGFB1	1
TGFB2	1
TGFB3	1
TIMP1	1
TIMP2	1
TIMP3	1
TIMP4	1
TJP1	1
TLR2	1
TLR4	1
TNFRSF10B	1
TNFRSF11A	1
TNFRSF11B	1
TNFRSF19	1
TNFRSF4	1
TNFSF10	1
TNFSF11	1
TNFSF13B	1
TNFSF15	1
TP53	1
TRADD	1
TYMP	1
U2AF1	1
U2AF2	1
VCAM1	1
VEGFC	1
WNT10B	1
XIAP	1

## Sheet: Alzheimers and HIV
Shared neighboring genes between AIDS and Alzheimer"s Disease
ACE	1
ADIPOQ	1
AGT	1
AKT1	1
ALB	1
APCS	1
APOC3	1
APP	1
BCL2	1
BIRC2	1
BIRC3	1
BRCA1	1
C5	1
CASP2	1
CASP3	1
CASP7	1
CASP8	1
CASP9	1
CCL19	1
CCL2	1
CCL3	1
CCL4	1
CCL7	1
CD14	1
CD1A	1
CD1D	1
CD36	1
CD3E	1
CD4	1
CD40	1
CD44	1
CD59	1
CD68	1
CD69	1
CD74	1
CD80	1
CD83	1
CD86	1
CD8A	1
CFB	1
CFLAR	1
CHUK	1
COPS5	1
CP	1
CPSF6	1
CREB1	1
CRH	1
CTTN	1
CX3CL1	1
CXCL12	1
CXCL13	1
CXCL2	1
CXCL3	1
CXCR4	1
CYLD	1
DAXX	1
DNAH11	1
DYNC1H1	1
DYNLL2	1
EDN1	1
EFNA1	1
EFTUD2	1
EGF	1
EGFR	1
ESR2	1
EXOSC9	1
FADD	1
FASLG	1
FBN1	1
FGF2	1
FLT1	1
FOS	1
GHRH	1
GRB2	1
HLA-A	1
HLA-DMA	1
HLA-DOA	1
HLA-DOB	1
HLA-DPA1	1
HLA-DPB1	1
HLA-DQA1	1
HLA-DQA2	1
HLA-DQB1	1
HLA-DQB2	1
HLA-DRA	1
HLA-DRB3	1
HLA-DRB4	1
HLA-E	1
HNRPLL	1
HSP90B1	1
HTT	1
ICAM1	1
IFNG	1
IGF1	1
IKBKB	1
IKBKG	1
IL10	1
IL12B	1
IL17A	1
IL1A	1
IL1B	1
IL23A	1
IL4	1
IL5	1
IL6	1
IL6R	1
IL7	1
IL7R	1
INS	1
IRAK1	1
IRS1	1
ITGAL	1
ITGAM	1
ITGB2	1
JAK2	1
JUN	1
KIR2DL1	1
LCK	1
LDLR	1
LEP	1
LIPE	1
LPL	1
LTBP4	1
LTK	1
MALT1	1
MAP2K1	1
MAPK1	1
MAPK3	1
MPP5	1
MYC	1
MYD88	1
NFKB1	1
NFKB2	1
NFKBIA	1
NFKBIB	1
NFKBIE	1
NGF	1
NHP2L1	1
NOD2	1
NOS2	1
NRG1	1
OLR1	1
PDE4B	1
PDE4D	1
PF4	1
PLG	1
PMCH	1
POMC	1
PSEN1	1
PTGS1	1
PTK2	1
PTPRC	1
PUF60	1
RASA1	1
RBM39	1
REL	1
RELA	1
RELB	1
REN	1
RIPK1	1
RIPK2	1
S100A8	1
SELE	1
SERPINE1	1
SH2B3	1
SLC2A1	1
SNRPF	1
SNRPG	1
SP1	1
SPP1	1
SRSF4	1
SRSF5	1
SST	1
STAT1	1
STAT3	1
SYK	1
SYT1	1
TBP	1
TGFA	1
TGFB1	1
TGFB2	1
TIA1	1
TIAL1	1
TJP1	1
TLR2	1
TLR6	1
TNFRSF11A	1
TNFRSF11B	1
TNFRSF1A	1
TNFRSF1B	1
TNFSF10	1
TP53	1
TRADD	1
TRAF1	1
TYROBP	1
U2AF1	1
VCAM1	1
VEGFA	1

## Sheet: Parkinson & HIV
Shared neighboring genes between AIDS and Parkinson's Disease
ACTB	1
ADAM10	1
ADRBK1	1
AKT1	1
APAF1	1
APOE	1
APP	1
AZGP1	1
B2M	1
BCAM	1
CASP3	1
CASP7	1
CASP8	1
CCL19	1
CD14	1
CD1A	1
CD1D	1
CD36	1
CD38	1
CD3E	1
CD4	1
CD40	1
CD68	1
CD74	1
CD79A	1
CD83	1
CD86	1
CDK12	1
CDK2	1
CHUK	1
CSF1R	1
CXCR4	1
EGFR	1
EIF2AK2	1
FAS	1
FLJ45422	1
GRB2	1
HLA-A	1
HLA-DMA	1
HLA-DMB	1
HLA-DOA	1
HLA-DOB	1
HLA-DPA1	1
HLA-DPB1	1
HLA-DQA1	1
HLA-DQA2	1
HLA-DQB1	1
HLA-DQB2	1
HLA-DRB1	1
HLA-DRB2	1
HLA-DRB3	1
HLA-DRB4	1
HLA-E	1
HLA-F	1
HLA-G	1
HLA-H	1
HTT	1
IKBKB	1
IKBKE	1
IRAK1	1
IRAK3	1
IRAK4	1
KLC3	1
LOC554223	1
LOC652614	1
LOC652774	1
LSM7	1
LY75	1
MAP2K1	1
MAP3K12	1
MAP3K14	1
MAP3K7	1
MAP3K8	1
MAPK1	1
MAPK14	1
MAPK3	1
MAPK9	1
MAPKAPK2	1
MPO	1
MR1	1
NOS3	1
PRPF4B	1
RAET1E	1
RAET1G	1
RAET1L	1
RASA1	1
RB1	1
RELT	1
RIPK1	1
RIPK2	1
RIPK3	1
SMPD1	1
SYK	1
SYT1	1
TAOK2	1
TRAF6	1
TTK	1
UGCG	1
ULBP1	1
ULBP2	1
ULBP3	1

## Sheet: Multiple Sclerosis and HIV
Shared neighboring genes between AIDS and Multiple Sclerosis
ACE	1
ADAM11	1
ADAM9	1
ADCYAP1	1
ADRBK1	1
AGT	1
AIMP1	1
AIRE	1
AKT1	1
ANXA5	1
APAF1	1
APOE	1
ATF2	1
B2M	1
BAG4	1
BCAM	1
BCL10	1
BCL2	1
BCL2L1	1
BCL2L11	1
BCL3	1
BIRC2	1
BIRC3	1
BLNK	1
BMP2	1
BRCA1	1
BRE	1
C5	1
C5AR1	1
CASP2	1
CASP3	1
CASP7	1
CASP8	1
CASP9	1
CCL11	1
CCL17	1
CCL19	1
CCL2	1
CCL20	1
CCL21	1
CCL22	1
CCL24	1
RIPK2	1
RIPK3	1
RUNX2	1
S100A10	1
S100A8	1
S100A9	1
SELE	1
SELL	1
SELP	1
SERPINE1	1
SF3B3	1
SH2B3	1
SKIV2L2	1
SLC11A1	1
SLC28A1	1
SLC5A5	1
SLC7A2	1
SMAD6	1
SMPD2	1
SOCS1	1
SOCS3	1
SP1	1
SPN	1
SPP1	1
SST	1
STAT1	1
STAT2	1
STAT4	1
STAT6	1
SUMO1	1
SYK	1
SYT1	1
TANK	1
TAOK2	1
TAP1	1
TAP2	1
TBP	1
TBX21	1
TEC	1
TFRC	1
TGFA	1
TGFB1	1
CCL26	1
CCL3	1
CCL4	1
CCL5	1
CCL7	1
CD14	1
CD1D	1
CD27	1
CD274	1
CD36	1
CD3E	1
CD4	1
CD40LG	1
CD44	1
CD59	1
CD68	1
CD69	1
CD70	1
CD74	1
CD79A	1
CD83	1
CD8A	1
CDK12	1
CDK2	1
CFB	1
CFLAR	1
CHUK	1
CIITA	1
CREB1	1
CRP	1
CSF1R	1
CSF2	1
CSF3	1
CXCL1	1
CXCL10	1
CXCL11	1
CXCL12	1
CXCL13	1
CXCL2	1
CXCL3	1
CXCL5	1
CXCL6	1
TGFB2	1
TGFB3	1
THBD	1
TIMP1	1
TK1	1
TLR1	1
TLR2	1
TLR3	1
TLR4	1
TLR5	1
TLR6	1
TLR7	1
TNFRSF10B	1
TNFRSF11A	1
TNFRSF11B	1
TNFRSF13B	1
TNFRSF13C	1
TNFRSF17	1
TNFRSF18	1
TNFRSF19	1
TNFRSF1B	1
TNFRSF25	1
TNFRSF4	1
TNFRSF8	1
TNFRSF9	1
TNFSF-12	1
TNFSF-13	1
TNFSF10	1
TNFSF11	1
TNFSF13B	1
TNFSF15	1
TNFSF18	1
TNFSF4	1
TNFSF8	1
TNFSF9	1
TP53	1
TRAF1	1
TRAF2	1
TRAF3	1
TRAF4	1
TRAF5	1
TRAF6	1
TSLP	1
CXCL9	1
CXCR3	1
CXCR4	1
CXCR5	1
CYBB	1
CYLD	1
DAXX	1
DCT	1
DDX18	1
DHX15	1
DNAH11	1
DNAH17	1
DNAI1	1
DYNC1H1	1
DYNC1I2	1
EBI3	1
ECE1	1
EDA	1
EDA2R	1
EDAR	1
EDN1	1
EFTUD2	1
EGF	1
EGFR	1
EGR1	1
EIF2AK2	1
ELANE	1
EPO	1
ESR2	1
ETS1	1
ETS2	1
F2RL1	1
FADD	1
FANCD2	1
FAS	1
FASLG	1
FBN1	1
FCGRT	1
FGF1	1
FGF2	1
FLJ45422	1
FLT1	1
TYRO3	1
TYROBP	1
ULBP1	1
ULBP2	1
ULBP3	1
VEGFA	1
XIAP	1
FLT3LG	1
FN1	1
FOS	1
FOSL1	1
GHR	1
GHRH	1
GRB2	1
HFE	1
HGF	1
HIF1A	1
HLA-DMA	1
HLA-DMB	1
HLA-DOA	1
HLA-DOB	1
HLA-DPA1	1
HLA-DPB1	1
HLA-F	1
HLA-G	1
HLA-H	1
HNRNPU	1
ICAM1	1
ICAM2	1
ICOS	1
ICOSLG	1
IER3	1
IFNAR2	1
IFNB1	1
IFNG	1
IFNGR1	1
IFNGR2	1
IGF1	1
IKBKB	1
IKBKE	1
IKBKG	1
IL10	1
IL10RA	1
IL11	1
IL12A	1
IL12RB1	1
IL13RA2	1
IL15	1
IL16	1
IL17A	1
IL17F	1
IL18	1
IL18BP	1
IL19	1
IL1A	1
IL1B	1
IL1R1	1
IL2	1
IL21	1
IL22	1
IL23A	1
IL23R	1
IL24	1
IL2RG	1
IL4	1
IL4R	1
IL5	1
IL6	1
IL6R	1
IL7	1
IL8	1
IL9	1
INS	1
IRAK1	1
IRAK3	1
IRAK4	1
IRF1	1
IRF3	1
IRF7	1
IRS1	1
ITGA5	1
ITGAL	1
ITGAM	1
ITGB1	1
ITGB2	1
JAG1	1
JAK2	1
JUN	1
KIR2DL1	1
KIR2DS2	1
KITLG	1
KLC3	1
KLRD1	1
LBP	1
LCK	1
LDLR	1
LEP	1
LIF	1
LILRB1	1
LIPE	1
LOC554223	1
LOC652614	1
LOC652774	1
LRPAP1	1
LTA	1
LTBP4	1
LTBR	1
LTK	1
LY75	1
MADCAM1	1
MAP2K1	1
MAP3K14	1
MAP3K7	1
MAP3K8	1
MAPK14	1
MAPK3	1
MAPK9	1
MAPKAPK2	1
MBL2	1
MCL1	1
MDM2	1
MICA	1
MIF	1
MMP10	1
MMP2	1
MMP3	1
MOG	1
MR1	1
MST1R	1
MYD88	1
NFATC1	1
NFATC2	1
NFKB1	1
NFKB2	1
NFKBIA	1
NFKBIB	1
NFKBIE	1
NFX1	1
NGF	1
NKX2-1	1
NOD2	1
NOS2	1
NOTCH4	1
NR4A1	1
NRG1	1
NSMAF	1
NTAN1	1
OLR1	1
OSM	1
PARP1	1
PDGFA	1
PHEX	1
PIAS1	1
PMCH	1
PML	1
POMC	1
PPBP	1
PRL	1
PRPF4B	1
PTGS2	1
PTK2	1
PTPRC	1
RAC1	1
RAET1E	1
RAET1G	1
RAET1L	1
RAG2	1
RALBP1	1
RASA1	1
RB1	1
RBM45	1
REL	1
RELA	1
RELB	1
RIPK1	1

## Sheet: Autism-Autism spectrum & HIV
Shared neighboring genes between AIDS and Autism-Autism Spectrum
ADAM10	1
ADAM17	1
ADAM9	1
AQR	1
BCL2	1
BRCA1	1
C19orf29	1
C5	1
CDC40	1
CDC5L	1
COL6A1	1
CPSF6	1
CRNKL1	1
CWC15	1
CWC22	1
DDX17	1
DDX23	1
DDX41	1
DDX5	1
DHX15	1
DHX38	1
DHX8	1
EFTUD2	1
EIF4A3	1
ENPEP	1
ESR2	1
FADD	1
FAS	1
ISY1	1
LSM2	1
LSM4	1
LSM7	1
MAP2K1	1
MAPK1	1
MAPK3	1
MDM2	1
MMP10	1
MMP12	1
MMP13	1
MMP14	1
MMP15	1
MMP17	1
MMP2	1
MMP3	1
MMP7	1
MMP8	1
NUDT21	1
PAPPA	1
PHEX	1
PLRG1	1
PPIE	1
PPIH	1
PPIL1	1
PPIL3	1
PPWD1	1
PRPF18	1
PRPF19	1
PRPF3	1
PRPF31	1
PRPF4	1
PRPF4B	1
PRPF6	1
PRPF8	1
PUF60	1
RBM17	1
RBM22	1
RBM39	1
SART1	1
SERPINB2	1
SF1	1
SF3A1	1
SF3A2	1
SF3A3	1
SF3B1	1
SF3B2	1
SF3B3	1
SF3B4	1
SKIV2L2	1
SMNDC1	1
SNRNP200	1
SNRNP40	1
SNRNP70	1
SNRPA	1
SNRPA1	1
SNRPB	1
SNRPB2	1
SNRPC	1
SRRM1	1
SRRM2	1
SRSF1	1
SRSF2	1
SRSF4	1
SRSF5	1
SYF2	1
TFIP11	1
THOC3	1
THOC4	1
TIMP1	1
TIMP2	1
TIMP3	1
TIMP4	1
TNFRSF11B	1
TRAF6	1
TRPC1	1
TYMP	1
U2AF1	1
U2AF2	1
VEGFA	1
XAB2	1

## Sheet: Migrane & HIV
Shared neighboring genes between AIDS and Migrane
ACE	1
ADAM10	1
ADAM17	1
ADAM9	1
AKT1	1
APOE	1
APP	1
ATF2	1
CD40	1
CREB1	1
CTGF	1
CYP19A1	1
ECE1	1
EGF	1
EGR1	1
ELANE	1
ENPEP	1
FBN1	1
FOS	1
HSP90B1	1
ITGB2	1
JUN	1
LDLR	1
LPL	1
MDM2	1
MMP10	1
MMP12	1
MMP13	1
MMP14	1
MMP15	1
MMP17	1
MMP2	1
MMP3	1
MMP7	1
MMP8	1
MYC	1
NFATC1	1
NFATC2	1
NR4A1	1
NRG1	1
OLR1	1
PAPPA	1
PARD6B	1
PHEX	1
PLAU	1
POU2F1	1
PSEN1	1
RASA1	1
SERPINA1	1
SERPINB2	1
SERPINE1	1
SLC2A1	1
SP1	1
SRSF2	1
TIMP1	1
TIMP2	1
TIMP3	1
TIMP4	1
TJP1	1
VEGFA	1

## Sheet: Amyotrophic lat. sclerosis &HIV
Shared neighboring genes between AIDS and Amyotrophic Lateral Sclerosis
ADRBK1	1
AKT1	1
APP	1
BCL2	1
CDK12	1
CDK2	1
CHUK	1
CP	1
CSF1	1
CSF2	1
DAXX	1
EGFR	1
EIF2AK2	1
FADD	1
FAS	1
FASLG	1
FLT3LG	1
HIF1A	1
IFNAR2	1
IFNB1	1
IFNG	1
IKBKB	1
IKBKE	1
IL10	1
IL12B	1
IL19	1
IL22	1
IL24	1
IL26	1
IL6	1
IRAK1	1
IRAK3	1
IRAK4	1
KLC3	1
MAP2K1	1
MAP3K12	1
MAP3K14	1
MAP3K7	1
MAP3K8	1
MAPK1	1
MAPK14	1
MAPK3	1
MAPK9	1
MAPKAPK2	1
NFATC1	1
NFKBIA	1
NR4A1	1
OSM	1
PRPF4B	1
RIPK1	1
RIPK2	1
RIPK3	1
SOD2	1
SP1	1
STK39	1
TAOK2	1
TTK	1
VEGFA	1

## Sheet: vascular dementia & HIV
Shared neighboring genes between AIDS and Vascular Dementia
AGT	1
AKT1	1
CD3E	1
CD4	1
CD69	1
CD79A	1
CHUK	1
CXCL12	1
CXCR4	1
FASLG	1
GRB2	1
HNRNPU	1
ICAM2	1
IFNG	1
IKBKB	1
IKBKE	1
IL10	1
IL12B	1
IL15	1
IL2	1
IL4	1
IL6	1
IRAK1	1
IRS1	1
ITGA5	1
ITGAL	1
ITGAM	1
ITGB2	1
JAK2	1
JUN	1
KITLG	1
LCK	1
LTK	1
MAP2K1	1
MAP3K14	1
MAPK1	1
MAPK14	1
MAPK3	1
PMCH	1
PTK2	1
PTPRC	1
RAC1	1
RAG2	1
RASA1	1
SH2B3	1
SLA	1
STAT1	1
STAT3	1
STAT4	1
STAT6	1
TLR4	1
TNFSF11	1
TRAF6	1
TYROBP	1

## Sheet: Glaucoma & HIV
Shared neighboring genes between AIDS and Glaucoma
ABCB1	1
ADRBK1	1
AKT1	1
ANXA2	1
APP	1
BGN	1
BMP2	1
BMP4	1
BRCA1	1
CD36	1
CD4	1
CD40	1
CHI3L1	1
COL1A1	1
COL1A2	1
COL3A1	1
COL6A1	1
EDNRB	1
EGFR	1
FBN1	1
HMOX1	1
ICAM2	1
IRS1	1
LDLR	1
MAPK3	1
MMP14	1
MYC	1
NKX2-1	1
NOS2	1
NOS3	1
OLR1	1
PTGS1	1
PTGS2	1
PTK2	1
RAC1	1
RASA1	1
RB1	1
SOX9	1
SP1	1
TFRC	1
TNFRSF1B	1
TRADD	1
TRAF6	1
TRPC1	1
VEGFA	1

## Sheet: Nacrolepsy & HIV
Shared neighboring genes between AIDS and Nacrolepsy
AZGP1	1
B2M	1
CCL5	1
CD1A	1
CD1D	1
CD3E	1
CD4	1
CD8A	1
CXCR2	1
HFE	1
HLA-A	1
HLA-DMA	1
HLA-DMB	1
HLA-DOA	1
HLA-DOB	1
HLA-DPA1	1
HLA-DPB1	1
HLA-DQA1	1
HLA-DQB1	1
HLA-DQB2	1
HLA-DRB1	1
HLA-DRB2	1
HLA-DRB3	1
HLA-DRB4	1
HLA-E	1
HLA-F	1
HLA-G	1
HLA-H	1
ICAM2	1
IL7R	1
LCK	1
LOC554223	1
LOC652614	1
LOC652774	1
MR1	1
PTPRC	1
RAET1E	1
RAET1G	1
RAET1L	1
ULBP1	1
ULBP2	1
ULBP3	1

[truncated: 2 more sheets: Restless leg syndrome & HIV, Creutzfeldt-Jakob disease & HIV]
