# Supplementary material for: Common gene-network signature of different neurological disorders and their potential implications to neuroAIDS
Source: PLoS One. 2017 Aug 8;12(8):e0181642. doi: 10.1371/journal.pone.0181642 (PMC5549695; doi:10.1371/journal.pone.0181642)
Supplement: S3 Data — Common genes from gene interactants of different neurological disorders are represented. (XLSX) [file pone.0181642.s006.xlsx]

## Sheet: Sheet2
Selecting common gene from gene interactants of different neurological disorders.
																																Common 6	migrane	Common 8		Common 6	creutzfeld	Common 8		Common 6	narcolepsy
Mult. Scler	Age Macular	Common 1		Common 1	alzheimer's	Common 2		Common 2	Parkinson's	Common 3		Common 3	Amyotrophic Lateral Sclerosis	Common 4		Common 4	Vascular Dementia	Common 5		Common 5	restless leg syndrome	Common 6		Common 6	glaucoma	Common 7		Common 6	Autism-Autism Spectrum	Common 8			A2M				AANAT				ALCAM
AAK1		AAK1		AAK1	SEN2			ABL1	AACS	ABL1		ABL1	AAK1	ACVR1		ACVR1	ABL1	ACVR1		ACVR1	ABL1	ACVR1		ACVR1		AKT1		ACVR1	ABCE1	RAF1		ACVR1	AARS	AKT1		ACVR1	ADAM10	ROCK1		ACVR1	AZGP1
AARS	A2M	ABL1		ABL1	A2M	ABL1		ACVR1	AAK1	ACVR1		ACVR1	AATK	ADRBK2		ADRBK2	ACVR1	AKT1		AKT1	ACVR1	AKT1		AKT1	ABCA1	ILK		AKT1	ACE2	BRAF		AKT1	AARS2			AKT1	ANXA7	PRKCE		AKT1	B2M
AATK	A2ML1	ACAN		ACAN	ABCA1	ACVR1		ADCYAP1	AATF	ADRBK2		ADRBK2	ABP1	AKT1		AKT1	ACVR1C	BMPR1B		BMPR1B	ACVR2A	BRAF		BRAF	ABCB1	RAF1		BRAF	ACTN3			BRAF	ABAT			BRAF	APBB1			BRAF	CCL5
ABCC3	AAK1	ACVR1		ACVR1	ABCA2	ADCYAP1		ADRBK2	AATK	AKT1		AKT1	ACVR1	ALPK3		ALPK3	ACVR2A	BRAF		BRAF	ACVRL1	CDC42BPB		CDC42BPB	ABL1	SRC		CDC42BPB	ADA			CDC42BPB	ABT1			CDC42BPB	APC2			CDC42BPB	CD160
ABCE1	ABCA1	ACVR1B		ACVR1B	ABCA3	ADRBK2		AGT	ABI2	ALPK3		ALPK3	ACVR1B	ANG		ANG	ACVRL1	CDC42BPB		CDC42BPB	ADCK4	ILK		ILK	ACAN			ILK	ADAL			ILK	ACAD8			ILK	APLP1			ILK	CD1A
ABI1	ABL1	ACVR2A		ACVR2A	ABCA5	AGT		AKT1	ABL1	ALS2		ALS2	ACVR1C	APC		APC	ADAMTS5	CHUK		CHUK	ADRBK2	IRAK1		IRAK1	ACHE			IRAK1	ADAM10			IRAK1	ACADM			IRAK1	APLP2			IRAK1	CD1D
ABL1	ACAN	ACVRL1		ACVRL1	ABCA8	AKT1		ALPK3	ACACB	ANG		ANG	ACVR2A	BMPR1B		BMPR1B	AGT	IKBKB		IKBKB	AKT1	MAP2K3		MAP2K3	ADRBK1			MAP2K3	ADAM15			MAP2K3	ACADS			MAP2K3	APOE			MAP2K3	CD2
ABL2	ACHE	ADAM11		ADAM11	ABCA9	ALPK3		ALS2	ACAD8	APC		APC	ACVR2B	BRAF		BRAF	AKT1	ILK		ILK	AKT3	MAP2K4		MAP2K4	ADSL			MAP2K4	ADAM17			MAP2K4	ACADSB			MAP2K4	APP			MAP2K4	CD247
ABR	ACTC1	ADAM9		ADAM9	ABCB10	ALS2		ANG	ACAD9	ARAP1		ARAP1	ACVRL1	CDC42BPA		CDC42BPA	ARAF	IRAK1		IRAK1	ALPK3	MAPKAPK5		MAPKAPK5	AES			MAPKAPK5	ADAM21			MAPKAPK5	ACE			MAPKAPK5	APRT			MAPKAPK5	CD3D
ACAN	ACVR1	ADCK4		ADCK4	ABCB6	ANG		APC	ACADL	BMPR1B		BMPR1B	ADCK1	CDC42BPB		CDC42BPB	AXL	MAP2K1		MAP2K1	ALX3	PRKCA		PRKCA	AGRN			PRKCA	ADAM8			PRKCA	ACE2			PRKCA	AR			PRKCA	CD3E
ACAP1	ACVR1B	ADCYAP1		ADCYAP1	ABCB8	APC		ARAP1	ACADM	BRAF		BRAF	ADCK2	CHUK		CHUK	BLK	MAP2K3		MAP2K3	ALX4	PRKCE		PRKCE	AHCY			PRKCE	ADAM9			PRKCE	ACTA1			PRKCE	ARNT			PRKCE	CD3G
ACE	ACVR1C	ADRB2		ADRB2	ABCC4	ARAP1		AXL	ACADS	CASP3		CASP3	ADCK4	CTNNB1		CTNNB1	BLNK	MAP2K4		MAP2K4	ANKK1	RAF1		RAF1	AHCYL1			RAF1	ADAMDEC1			RAF1	ADAM10			RAF1	ARNT2			RAF1	CD4
ACTL6A	ACVR2A	ADRBK2		ADRBK2	ABCD1	AXL		BMPR1B	ACADSB	CD14		CD14	ADCK5	GSK3A		GSK3A	BMPR1B	MAP2K6		MAP2K6	ARAF	ROCK1		ROCK1	AKT1			ROCK1	ADAMTS1			ROCK1	ADAM15			ROCK1	ARNTL			ROCK1	CD48
ACVR1	ACVR2B	AGT		AGT	ABCD2	BMPR1B		BRAF	ACAT1	CD3E		CD3E	ADRBK1	GSK3B		GSK3B	BRAF	PRKCA		MAPKAPK5	ARID1B	SRC		SRC	ALX4			SRC	ADAMTS10			SRC	ADAM17			SRC	ASCL1			SRC	CD8A
ACVR1B	ACVRL1	AIMP1		AIMP1	ABCD4	BRAF		BRCA1	ACAT2	CD4		CD4	ADRBK2	IKBKB		IKBKB	BTK	PRKCE		PRKCA	ARX	WEE2		WEE2	ANXA2			WEE2	ADAMTS12			WEE2	ADAM21			WEE2	ASCL3			WEE2	CD8B
ACVR2A	ADAM10	AKAP13		AKAP13	ABCE1	BRCA1		C5	ACSF2	CDC42BPA		CDC42BPA	AKT1	ILK		ILK	BUB1	RAF1		PRKCE	AXL				APP				ADAMTS13				ADAM8				ATOH1				CLEC4M
ACVRL1	ADAM11	AKT1		AKT1	ABCF2	C5		CASP10	ACSS1	CDC42BPB		CDC42BPB	AKT2	IRAK1		IRAK1	CBL	ROCK1		RAF1	BAD				APRT				ADAMTS14				ADAM9				BCL2				CXCR2
ADA	ADAM12	AKT3		AKT3	ABCG1	CASP10		CASP3	ACSS2	CHUK		CHUK	AKT3	MAP2K1		MAP2K1	CBLB	SRC		ROCK1	BARX2				AR				ADAMTS15				ADAMDEC1				BHLHE40				CLEC4M
ADAL	ADAM2	ALK		ALK	ABCG8	CASP3		CCL2	ACTA1	CREBBP		CREBBP	ALDH2	MAP2K3		MAP2K3	CCL4	WEE2		SRC	BRAF				ARNTL				ADAMTS16				ADAMTS1				BHLHE41				CXCR2
ADAM11	ADAM23	ALPK3		ALPK3	ABI1	CCL2		CCL3	ACTB	CRKL		CRKL	ALPK1	MAP2K4		MAP2K4	CD19			WEE2	BRSK1				BARX1				ADAMTS17				ADAMTS10				BST1				HFE
ADAM9	ADAM28	ALS2		ALS2	ABI2	CCL3		CCL4	ACVR1	CSF1R		CSF1R	ALPK2	MAP2K6		MAP2K6	CD2				BRSK2				BARX2				ADAMTS18				ADAMTS12				BST2				HLA-A
ADCK1	ADAM33	ANG		ANG	ABI3	CCL4		CCL7	ACVR1B	CSK		CSK	ALPK3	MAPKAPK5		MAPKAPK5	CD22				BUB1B				BGN				ADAMTS19				ADAMTS13				CAV1				HLA-DMA
ADCK2	ADAM5P	ANKK1		ANKK1	ABL1	CCL7		CD14	ACVR1C	CTNNB1		CTNNB1	ALS2	MKNK1		MKNK1	CD247				CAMK1D				BMP2				ADAMTS2				ADAMTS14				CAV2				HLA-DMB
ADCK4	ADAM9	APC		APC	ABL2	CD14		CD19	ACVR2A	CXCR4		CXCR4	AMD1	PRKCA		PRKCA	CD3D				CAMK1G				BMP4				ADAMTS20				ADAMTS15				CAV3				HLA-DOA
ADCK5	ADAMDEC1	APEX1		APEX1	ACE	CD19		CD28	ACVR2B	ESR1		ESR1	AMHR2	PRKCE		PRKCE	CD3E				CAMK2D				BRCA1				ADAMTS3				ADAMTS16				CD14				HLA-DOB
ADCY1	ADAMTS1	APOE		APOE	ACHE	CD28		CD3E	ACVRL1	FYN		FYN	AMPH	RAF1		RAF1	CD3G				CAMKK1				BSG				ADAMTS4				ADAMTS17				CD24				HLA-DPA1
ADCYAP1	ADAMTS12	AR		AR	ACLY	CD3E		CD4	ACY 1	GRB2		GRB2	ANG	RIPK1		RIPK1	CD4				CASK				BTK				ADAMTS5				ADAMTS18				CD48				HLA-DPB1
ADRB2	ADAMTS13	ARAP1		ARAP1	ACOT7	CD4		CD44	ADAM10	GSK3A		GSK3A	ANKK1	ROCK1		ROCK1	CD5				CD4				C22orf28				ADAMTS6				ADAMTS19				CD55				HLA-DQA1
ADRBK1	ADAMTS14	ARHGEF1		ARHGEF1	ACTA1	CD44		CD69	ADCK1	GSK3B		GSK3B	AP1B1	ROCK2		ROCK2	CD69				CDC37				CAV3				ADAMTS7				ADAMTS2				CHEK2				HLA-DQB1
ADRBK2	ADAMTS15	ARNT		ARNT	ACTN1	CD69		CDC42BPA	ADCK2	IKBKB		IKBKB	APC	SRC		SRC	CD72				CDC42BPB				CBFB				ADAMTS8				ADAMTS20				CIT				HLA-DQB2
AFF2	ADAMTS16	ARNT2		ARNT2	ACTN2	CDC42BPA		CDC42BPB	ADCK4	ILK		ILK	APC2	SYT1		SYT1	CD79A				CDC42BPG				CCND1				ADAMTS9				ADAMTS3				CLASP2				HLA-DRA
AGAP1	ADAMTS17	ATF1		ATF1	ACTN3	CDC42BPB		CFLAR	ADCK5	IRAK1		IRAK1	APEH	TP53RK		TP53RK	CD79B				CDC7				CCND2				ADAMTSL1				ADAMTS4				CLOCK				HLA-DRB1
AGAP7	ADAMTS19	ATF3		ATF3	ACTN4	CFLAR		CHUK	ADRBK1	ITGB3		ITGB3	APP	TTBK2		TTBK2	CD8A				CDK11B				CD28				ADAMTSL2				ADAMTS5				CLU				HLA-DRB2
AGAP9	ADAMTS2	ATF4		ATF4	ACVR1	CHUK		CNTF	ADRBK2	JAK3		JAK3	ARAF	WEE2		WEE2	CD8B				CDK12				CD36				ADAMTSL3				ADAMTS6				CNTFR				HLA-DRB3
AGT	ADAMTS20	ATF6		ATF6	ACVRL1	CNTF		CR2	AFG3L1	LCK		LCK	ARVCF				CDC42BPB				CDK13				CD4				ADAMTSL4				ADAMTS7				CNTN1				HLA-DRB4
AGTR1	ADAMTS3	ATF7		ATF7	ADAMTSL1	CR2		CREB1	AFG3L2	LDLR		LDLR	ATM				CDK11B				CDK14				CD40				ADAMTSL5				ADAMTS8				CREB1				HLA-DRB5
AHR	ADAMTS4	AURKB		AURKB	ADCYAP1	CREB1		CREBBP	AGAP1	MAP2K1		MAP2K1	ATOX1				CHEK1				CDK18				CDH1				AGXT2				ADAMTS9				CREBBP				HLA-E
AICDA	ADAMTS5	AXL		AXL	ADIPOQ	CREBBP		CRKL	AGAP2	MAP2K3		MAP2K3	ATP2C1				CHUK				CDK3				CDH5				AIFM1				ADAMTSL1				CRY1				HLA-F
AIMP1	ADAMTS6	BATF3		BATF3	ADIPOR1	CRKL		CSF1	AGAP3	MAP2K4		MAP2K4	ATP2C2				CLK3				CDK6				CDK4				AIFM2				ADAMTSL2				CRY2				HLA-G
AIRE	ADAMTS7	BCAN		BCAN	ADRBK2	CSF1		CSF1R	AGK	MAP2K6		MAP2K6	ATP50				CRKL				CDK8				CDKN1A				AIFM3				ADAMTSL3				CRYL1				HLA-H
AKAP13	ADAMTS8	BCL10		BCL10	ADRM1	CSF1R		CSK	AKT1	MAPKAPK5		MAPKAPK5	ATP5J				CSF2RB				CDKL2				CDKN1B				AMBP				ADAMTSL4				CSNK1D				ICAM2
AKT1	ADAMTSL1	BCL2		BCL2	AGT	CSK		CTNNB1	AKT2	MKNK1		MKNK1	ATP7B				CSF3R				CDKN3				CDKN1C				AMPD2				ADAMTSL5				CSNK2A2				ICAM3
AKT2	ADAMTSL2	BCL2L1		BCL2L1	AHSG	CTNNB1		CXCL12	AKT3	MTOR		MTOR	ATR				CSK				CSF1R				CDKN2A				AMPD3				AKT1				CYP46A1				IGHA1
AKT3	ADAMTSL3	BMP2		BMP2	AKT1	CXCL12		CXCL2	ALDOB	PRKCA		PRKCA	AURKA				CTTN1				CSK				CDKN2C				ANAPC11				AKT2				DUSP1				IGHA2
ALCAM	ADAMTSL5	BMP2K		BMP2K	ALB	CXCL2		CXCL3	ALPK1	PRKCE		PRKCE	AURKB				CXCL12				CSNK1A1L				CDKN2D				ANK1				AMACR				DUSP19				IGHD
ALDH18A1	ADAP2	BMPR1B		BMPR1B	ALPK3	CXCL3		CXCR4	ALPK2	PTK2		PTK2	AURKC				CXCR4				CSNK1E				CDX2				ANK2				ANPEP				DUSP2				IGHE
ALK	ADCK4	BMPR2		BMPR2	ALS2	CXCR4		DAB2	ALPK3	PTPN6		PTPN6	BCL2				DBNL				CSNK1G3				CHAD				ANPEP				ANXA6				DUSP4				IGHG1
ALPK1	ADCYAP1	BRAF		BRAF	AMOT	DAB2		DAXX	ALS2	RAF1		RAF1	BMP2K				DDR2				CSNK2A1				CHDH				AQR				AOC2				DUSP8				IGHG2
ALPK2	ADK	BRCA1		BRCA1	AMPH	DAXX		DDR2	AMHR2	RIPK1		RIPK1	BMPR1A				DOK1				CUX1				CHI3L1				ARAF				APBB1				EEA1				IGHG3
ALPK3	ADM	BRCA2		BRCA2	ANG	DDR2		EDN1	AMY2B	ROCK1		ROCK1	BMPR1B				DYRK2				CUX2				CLEC3A				ARF3				APLP1				EFNB1				IGHG4
ALS2	ADRB2	BRE		BRE	ANK1	EDN1		EFTUD2	ANG	ROCK2		ROCK2	BMPR2				DYRK4				DAPK2				CLIC1				ARF4				APOA1				EP300				IGHM
AMICA1	ADRBK2	BRSK2		BRSK2	ANK3	EFTUD2		EGF	ANKK1	SHC1		SHC1	BNIP3				EEF2K				DMPK				CLIC4				ARF5				APOA2				EPAS1				IGKC
ANG	AGRN	BUB1		BUB1	ANXA6	EGF		EGFR	ANKRD27	SRC		SRC	BRAF				EGF				DSTYK				CNTNAP1				ARF6				APOC1				EPB41				IGKV1-5
ANKK1	AGRP	BUB1B		BUB1B	AP1B1	EGFR		EPHA2	AP1M1	SYT1		SYT1	BRSK1				EGFR				EGFR				COL10A1				ARID4B				APOE				EPB41L1				IGKV3D-11
ANLN	AGT	C5		C5	AP2A1	EPHA2		EPHB4	AP1M2	TGFB1		TGFB1	BRSK2				EPHA2				EN1				COL11A2				ARL1				APP				ERI3				IGLC2
ANPEP	AGXT	C6		C6	AP2A2	EPHB4		ERBB2	AP2A2	TNF		TNF	BSN				EPHA5				EPAS1				COL12A1				ARL8B				ASCL1				ESR1				IL7R
ANXA5	AIMP1	CAMK1D		CAMK1D	AP2B1	ERBB2		ERBB3	AP2M1	TP53RK		TP53RK	BUB1				EPHA8				EPHA1				COL13A1				ASTL				ASTL				ESR2				KIR2DL3
AOC2	AKAP13	CAMK1G		CAMK1G	AP2M1	ERBB3		ESR1	APAF1	TTBK2		TTBK2	BUB1B				EPHB4				EPHA4				COL14A1				ATIC				ATF2				EZR				LAG3
APAF1	AKT1	CAMK2D		CAMK2D	APAF1	ESR1		ESR2	APBB1	VAV1		VAV1	CADPS				EPOR				EPHA5				COL15A1				ATRX				BACE1				FIGLA				LCK
APC	AKT3	CAMKK1		CAMKK1	APBB1	ESR2		F2R	APBB2	VAV2		VAV2	CADPS2				ERBB2				EPHB1				COL16A1				BAT1				BMP1				FYN				LILRA1
APEX1	ALB	CARD8		CARD8	APBB2	F2R		FADD	APC	VAV3		VAV3	CALM1				ERBB3				EPHB4				COL17A1				BCL2				C1QTNF3				GFAP				LILRA2
APOE	ALK	CASP10		CASP10	APC	FADD		FASLG	APOA1	WEE2		WEE2	CAMK1				ERBB4				EPM2A				COL18A1				BLVRA				C2				GFRA1				LILRA3
AR	ALPK3	CASP3		CASP3	APCS	FASLG		FBN1	APOA4				CAMK1D				FASLG				ERBB2				COL19A1				BLVRB				C7orf11				GFRA2				LILRB4
ARAF	ALS2	CASP8		CASP8	APOA1	FBN1		FES	APOB				CAMK2A				FCER1A				ERN2				COL1A1				BMP1				CABIN1				GFRA3				LOC554223
ARAP1	AMHR2	CAV1		CAV1	APOA1BP	FES		FGF2	APOE				CAMK2B				FCER1G				FES				COL1A2				BRAF				CACNA1D				GML				LOC649853
ARCN1	ANAPC5	CCL11		CCL11	APOA2	FGF2		FGFR2	APP				CAMK2D				FCGR1A				FGFR4				COL23A1				BRAP				CALR				GTF2B				LOC652614
ARFGAP2	ANG	CCL16		CCL16	APOA4	FGFR2		FGFR3	AR				CAMK2G				FCGR2A				FLT1				COL24A1				BRCA1				CARKD				HAND1				LOC652694
ARHGAP1	ANGPT1	CCL17		CCL17	APOA5	FGFR3		FGFR4	ARAF				CAMK4				FCGR2B				FLT3				COL27A1				C14orf69				CARM1				HAND2				LOC652774
ARHGAP20	ANGPT2	CCL2		CCL2	APOB	FGFR4		FLT1	ARAP1				CAMKK1				FCGR3B				FYN				COL2A1				C19orf29				CAV1				HES6				LOC730410
ARHGAP21	ANGPT4	CCL20		CCL20	APOB48R	FLT1		FLT3	ARF1				CAMKK2				FES				GAK				COL3A1				C20orf7				CBL				HEY1				LY9
ARHGAP23	ANGPTL1	CCL21		CCL21	APOC3	FLT3		FOS	ARF3				CAMKV				FGFR4				GRK1				COL4A1				C5				CCNA2				HEY2				MET
ARHGAP24	ANGPTL2	CCL3		CCL3	APOD	FOS		FURIN	ARF4				CAT				FGR				GRK7				COL4A2				CABP1				CCNB1				HEYL				MICB
ARHGAP25	ANGPTL3	CCL4		CCL4	APOF	FURIN		FYN	ARF5				CCS				FYB				GSK3A				COL4A3				CACNA1A				CD40				HIF1A				MR1
ARHGEF1	ANGPTL4	CCL5		CCL5	APOL1	FYN		GAK	ARHGEF2				CDC42BPA				FYN				HIF1A				COL4A4				CACNA1B				CD82				HSPA5				MSLN
ARHGEF11	ANGPTL6	CCL7		CCL7	APOL4	GAK		GHRH	ARL14				CDC42BPB				GAB2				HIPK1				COL4A5				CACNA1D				CDH1				HSPD1				NRG2
ARHGEF12	ANGPTL7	CCND1		CCND1	APOM	GHRH		GRB2	ARL4A				CDC42BPG				GRAP2				HIPK2				COL4A6				CACNA1E				CDK1				HTT				OPCML
ARHGEF18	ANKK1	CD14		CD14	APP	GRB2		GSK3A	ARL4C				CDC7				GRB2				HMGB1				COL5A1				CACNA1F				CLYBL				ID2				PLXNB1
ARHGEF25	APC	CD163L1		CD163L1	APPBP2	GSK3A		GSK3B	ARL8B				CDH2				HCK				HNF1B				COL5A2				CACNA1G				COLEC12				KAT2B				PTPRC
ARHGEF40	APCS	CD19		CD19	ARAF	GSK3B		HAND1	ASAH1				CDK1				HCLS1				HOXA10				COL5A3				CACNA1H				CPB2				KCNH2				PTPRU
ARHGEF6	APEX1	CD28		CD28	ARAP1	HAND1		HAND2	ATAD1				CDK10				HNRNPU				HOXA11				COL6A1				CACNA1I				CREB1				LBP				RAET1E
ARNT	APOA1	CD2AP		CD2AP	ARF3	HAND2		HSP90B1	ATAD2B				CDK11A				ICAM2				HOXA13				COL6A1				CACNA1S				CREBBP				LDLRAP1				RAET1G
ARNT2	APOA2	CD34		CD34	ARHGAP10	HSP90B1		ICAM1	ATG4A				CDK11B				ICAM3				HOXA2				COL6A3				CACNA2D1				CREM				LSAMP				RAET1L
ARNTL	APOA4	CD3E		CD3E	ARHGAP15	ICAM1		IFNG	ATG4C				CDK12				IFNG				HOXA3				COL7A1				CACNA2D2				CTGF				MAL				SEMA4D
ARR3	APOA5	CD4		CD4	ARHGAP20	IFNG		IGF1	ATG4D				CDK13				IGF1R				HOXA4				COL8A1				CACNA2D4				CTNNB1				MAPK8IP1				SLAMF1
ARRB1	APOB	CD40LG		CD40LG	ARHGAP21	IGF1		IGF1R	ATIC				CDK14				IGF2R				HOXA5				COL8A2				CACNB1				CUBN				MAPT				TAPB
ARRB2	APOC1	CD44		CD44	ARHGAP26	IGF1R		IGF2	ATM				CDK15				IKBKB				HOXA7				COL9A1				CACNB3				CYP19A1				MDM2				THY1
ASAP1	APOC2	CD69		CD69	ARHGAP32	IGF2		IKBKB	ATP12A				CDK16				IKBKE				HOXA9				COL9A2				CACNB4				DAB1				MLXIPL				TRGV3
ASCL1	APOC3	CDC42BPA		CDC42BPA	ARHGAP42	IKBKB		IL10	ATP6V0D1				CDK17				IL10				HOXB1				COL9A3				CACNG1				DAB2				MSN				ULBP1
ASCL3	APOC4	CDC42BPB		CDC42BPB	ARHGAP5	IL10		IL17A	ATR				CDK18				IL12B				HOXB13				COLQ				CACNG2				DLG4				MTM1				ULBP2
ATF1	APOD	CDC42BPG		CDC42BPG	ARPC4	IL17A		IL1A	AUH				CDK19				IL15				HOXB4				COMP				CACNG3				DPP10				MTMR1				ULBP3
ATF2	APOE	CDC7		CDC7	ASAP1	IL1A		IL1B	AURKA				CDK2				IL15RA				HOXB6				COPB1				CACNG4				DPP6				MTMR12				VSIG2
ATF3	APOL1	CDK1		CDK1	ASAP2	IL1B		IL4	AURKB				CDK20				IL2				HOXB8				CREBBP				CACNG6				DPP8				MTMR14
ATF4	APP	CDK11A		CDK11A	ASCL1	IL4		IL5	AURKC				CDK3				IL2RB				HOXC13				CRX				CACNG7				DPP9				MTMR2
ATF5	AR	CDK11B		CDK11B	ATP2A2	IL5		IL6	AVPR1B				CDK4				IL4				HOXD1				CSK				CACNG8				DRD2				MTMR6
ATF6	ARAP1	CDK12		CDK12	ATP5B	IL6		IL6R	AZGP1				CDK5				IL6				HOXD11				CTBP1				CALM3				ECE1				MTMR9
ATF6B	ARAP2	CDK13		CDK13	AXL	IL6R		IL7	B2M				CDK6				ILK				HOXD12				CTHRC1				CARM1				ECEL1				MXD1
ATF7	ARAP3	CDK14		CDK14	BACE1	IL7		ILK	BCAM				CDK7				INPP5D				HOXD13				CYC1				CBX1				ECHDC2				MYC
ATM	AREG	CDK17		CDK17	BARD1	ILK		INS	BCHE				CDK8				INSR				HOXD4				CYTB				CBX5				ECHS1				MYCL1
ATOH1	ARHGEF6	CDK18		CDK18	BAT1	INS		INSR	BCKDHA				CDK9				IRAK1				HOXD9				DACH1				CBX8				EGF				MYF5
ATP7B	ARL4D	CDK2		CDK2	BCAR1	INSR		IRAK1	BCKDHB				CDKL1				IRAK2				HSP90AB1				DACH2				CDA				EGR1				MYOD1
ATR	ARNT	CDK20		CDK20	BCHE	IRAK1		IRS1	BCR				CDKL2				IRS1				HSPA4				DAG1				CDC40				EIF4EBP1				NCAM1
AURKA	ARNT2	CDK3		CDK3	BCL2	IRS1		IRS2	BIRC5				CDKL3				ITGA2				HUNK				DLL1				CDC5L				ELANE				NCOA1
AURKB	ASH2L	CDK4		CDK4	BCL20	IRS2		ITGAM	BMP2K				CDKL4				ITGA2B				ICK				DLX3				CDH15				ELF1				NCOA3
AURKC	ATF1	CDK5		CDK5	BCR	ITGAM		ITGB3	BMPR1A				CDKL5				ITGA5				IKBKE				DLX5				CDH19				ENPEP				NEUROD2
AXL	ATF3	CDK6		CDK6	BIN2	ITGB3		JAK2	BMPR1B				CFL1				ITGAL				ILK				DMRT1				CDH2				EP300				NFIL3
AZGP1	ATF4	CDK8		CDK8	BIN3	JAK2		JAK3	BMPR2				CHEK1				ITGAM				INSR				DMTF1				CDH6				ERAP1				NPAS1
B2M	ATF6	CDKL1		CDKL1	BIRC2	JAK3		JUN	BRAF				CHEK2				ITGB2				INSRR				DNM1				CDH7				ETFA				NPAS4
BACH1	ATF7	CDKL2		CDKL2	BIRC3	JUN		KIT	BRSK1				CHUK				JAK1				IRAK1				DPP4				CDH8				ETFDH				NR1D1
BAG2	ATP2A2	CEBPB		CEBPB	BMP8B	KIT		LCK	BRSK2				CIT				JAK2				IRAK2				DST				CDH9				EXOC7				NR1D2
BAG4	ATRN	CFLAR		CFLAR	BMPR1B	LCK		LDLR	BUB1				CLASP1				JAK3				IRAK3				DYSF				CDK5				EZR				NR3C2
BANF1	ATXN1	CHEK2		CHEK2	BOLL	LDLR		LEP	BUB1B				CLASP2				JUN				IRAK4				EDNRB				CDK5R1				F8				OPCML
BATF2	ATXN7	CHUK		CHUK	BPIL1	LEP		LIPE	C7orf10				CLK1				KIT				ISL1				EFEMP2				CECR1				FAHD1				PAFAH1B1
BATF3	AURKB	CIT		CIT	BRAF	LIPE		LRP1	CAD				CLK2				KITLG				JAK3				EGFR				CENPA				FAP				PER1
BCAM	AXIN1	CLK3		CLK3	BRCA1	LRP1		LTBP4	CADPS				CLK2P				LAT				JUN				EMILIN1				CHD1				FBN1				PER2
BCAN	AXL	CNTF		CNTF	BTK	LTBP4		LTK	CADPS2				CLK3				LATS1				KALRN				EMILIN2				CHD2				FHL2				PER3
BCAS1	AZU1	COL6A3		COL6A3	BZW1	LTK		MAP2K1	CALM1				CLK4				LATS2				KSR1				EMX1				CHD3				FOLH1				PGR
BCL10	BACH2	CORIN		CORIN	BZW1P2	MAP2K1		MAP2K3	CAMK1				COX17				LAX1				KSR2				EN2				CHD4				FOS				PGRMC1
BCL2	BAI1	COX11		COX11	C1QB	MAP2K3		MAP2K4	CAMK1D				CP				LCK				LATS1				EP300				CHD5				FURIN				PIK3C3
BCL2L1	BAI2	CPSF3L		CPSF3L	C1QBP	MAP2K4		MAP2K6	CAMK1G				CPNE1				LCP1				LATS2				ERBB2				CHD6				GATA4				PLAUR
BCL2L11	BAK1	CR2		CR2	C20orf185	MAP2K6		MAPKAPK5	CAMK2A				CSF1				LCP2				LCK				ERBB2IP				CHD7				GATA5				PLD1
BCL3	BARD1	CREB1		CREB1	C20orf70	MAPKAPK5		MATK	CAMK2B				CSF2				LMTK2				LHX1				ESR1				CHFR				GATA6				PLG
BCL6	BATF3	CREB3		CREB3	C5	MATK		MET	CAMK2D				CSNK1A1				LMTK3				LHX3				EYA1				CIRBP				GBE1				PRKCD
BCR	BAX	CREB3L1		CREB3L1	C6orf25	MET		MIF	CAMK2G				CSNK1A1L				LOC651610				LOC441868				EYA2				CLMN				GCDH				PRKCE
BDKRB2	BCAN	CREB3L4		CREB3L4	C8B	MIF		MKNK1	CAMK2N1				CSNK1D				LTK				LOC651008				EYA3				CNGA2				GLRX				PRND
BHLHE22	BCL10	CREB5		CREB5	CACNA1A	MKNK1		MMP2	CAMK4				CSNK1E				LYN				LRRK1				EYA4				CNGA3				GRIN2B				PRPS2
BHLHE40	BCL2	CREBBP		CREBBP	CACNA1B	MMP2		MMP9	CAMKK1				CSNK1G1				MAP2K1				LRRK2				EZR				CNGB3				GSK3B				PRPSAP1
BIN1	BCL2L1	CREM		CREM	CACNA1C	MMP9		MSR1	CAMKK2				CSNK1G2				MAP2K3				MAFB				FAHD1				COL6A1				GULP1				PSEN1
BIRC2	BDNF	CRKL		CRKL	CACNA1D	MSR1		MTOR	CAMKV				CSNK1G3				MAP2K4				MAK				FBLN1				COL6A2				HACL1				PTEN
BIRC3	BMP1	CRP		CRP	CACNA1E	MTOR		MUSK	CAP1				CSNK2A1				MAP2K6				MAP2K3				FBLN2				COL7A1				HAND1				PTF1A
BLK	BMP10	CSF1		CSF1	CACNA1F	MUSK		MYD88	CASK				CSNK2A2				MAP3K1				MAP2K4				FBN1				COPB1				HAT1				RARA
BLNK	BMP2	CSF1R		CSF1R	CACNA1H	MYD88		MYO3A	CASP3				CTNNB1				MAP3K10				MAP3K1				FBN2				COPG				HDAC1				RARB
BLOC1S1	BMP2K	CSF2		CSF2	CACNA1I	MYO3A		PLAU	CASP6				CUBN				MAP3K13				MAP3K10				FBN3				COQ3				HDAC2				RDX
BMP2	BMP4	CSF3		CSF3	CACNA1S	PLAU		PMCH	CASP7				CYCS				MAP3K14				MAP3K11				FLOT1				CORO2A				HDAC3				ROCK1
BMP2K	BMP5	CSK		CSK	CACNA2D1	PMCH		PRKCA	CASP8				CYGB				MAP3K15				MAP3K13				FLOT2				CPSF6				HDAC4				RORA
BMPR1B	BMP6	CSNK1A1		CSNK1A1	CACNB1	PRKCA		PRKCE	CBR4				CYP17A1				MAP3K6				MAP3K14				FLRT1				CRADD				HDAC5				RORB
BMPR2	BMP7	CSNK1E		CSNK1E	CACNB3	PRKCE		PRL	CBS				DAPK2				MAP4K1				MAP3K15				FLRT2				CREBBP				HDAC7				RXRA
BMX	BMPR1A	CSNK1G3		CSNK1G3	CACNG2	PRL		PSMB8	CCDC88A				DAPK3				MAPK1				MAP3K2				FLRT3				CRMP1				HDAC8				SBF1
BNIP3L	BMPR1B	CSNK2A2		CSNK2A2	CACNG7	PSMB8		PTK2	CCL19				DAXX				MAPK12				MAP3K3				FN1				CRNKL1				HDAC9				SCN2A
BRAF	BMPR2	CTF1		CTF1	CACNG8	PTK2		PTPN6	CCNG1				DCLK1				MAPK14				MAP3K6				FOXC1				CWC15				HEXA				SHBG
BRCA1	BNIP3	CTNNB1		CTNNB1	CADM1	PTPN6		RAF1	CD14				DCLK2				MAPK3				MAP3K7				FOXI1				CWC22				HMBS				SIM1
BRCA2	BOK	CTSS		CTSS	CADM3	RAF1		RELN	CD1A				DCLK3				MAPK4				MAP4K1				FOXN1				CYTH1				HMGCL				SIM2
BRE	BPI	CXCL1		CXCL1	CADM4	RELN		RIPK1	CD1D				DLG1				MAPK7				MAP4K3				FOXO1				CYTH2				HMGCLL1				SPTAN1
BRIX1	BPIL1	CXCL10		CXCL10	CADPS2	RIPK1		ROCK1	CD24				DLG3				MATK				MAPK1				FOXO3				CYTH3				HNRNPD				SREBF2
BRSK1	BPIL2	CXCL12		CXCL12	CALR	ROCK1		ROCK2	CD2AP				DLG4				MERTK				MAPK10				FOXO4				DCP1A				HRAS				STIP1
BRSK2	BPIL3	CXCL2		CXCL2	CAPZA1	ROCK2		ROS1	CD30				DMPK				MET				MAPK12				FYN				DCP2				HSP90B1				SYNJ1
BTG1	BRAF	CXCL3		CXCL3	CAPZA2	ROS1		SELE	CD36				DOC2A				MS4A2				MAPK14				GATA1				DDX17				HSPE1				SYTL4
BTK	BRCA1	CXCL5		CXCL5	CAPZB	SELE		SERPINE1	CD38				DPEP1				MSN				MAPK15				GATA2				DDX23				ITGB1BP1				TBP
BTN3A1	BRCA2	CXCL6		CXCL6	CARD16	SERPINE1		SH3KBP1	CD3E				DPEP2				MUSK				MAPK3				GATA3				DDX41				ITGB2				TCF4
BTN3A3	BRE	CXCR4		CXCR4	CARD17	SH3KBP1		SHC1	CD4				DPEP3				NEK1				MAPK4				GATA4				DDX5				IVD				TCFL5
BUB1	BRSK2	CYP21A2		CYP21A2	CARD18	SHC1		SMAD1	CD40				DPP10				NLK				MAPK6				GATA5				DDX6				JUN				TFAP4
BUB1B	BSG	DAB2		DAB2	CARM1	SMAD1		SMAD2	CD48				DPP4				NPY6R				MAPK7				GATA6				DECR1				KAT2B				TFE3
C10orf2	BTBD2	DAPK2		DAPK2	CASK	SMAD2		SMAD3	CD53				DPP8				NTRK3				MAPK8				GBX1				DECR2				KAT5				TFEB
C1QBP	BTC	DAPP1		DAPP1	CASP1	SMAD3		SMAD4	CD63				DPP9				OBSCN				MAPK9				GBX2				DGCR14				KCNA10				TFEC
C5	BUB1	DAXX		DAXX	CASP10	SMAD4		SMAD5	CD68				DSTYK				PAG1				MAPKAPK3				GCM2				DHODH				KCNA3				THY1
C5AR1	BUB1B	DDR2		DDR2	CASP12	SMAD5		SMURF2	CD74				DYRK1A				PAK6				MAPKAPK5				GDA				DHX15				KCNA5				TIMELESS
C6	C1QA	DDX20		DDX20	CASP14	SMURF2		SPP1	CD79A				DYRK1B				PDGFRB				MARK1				GJA1				DHX38				KCNB2				UMOD
C8B	C1QB	DIABLO		DIABLO	CASP2	SPP1		SRC	CD79B				DYRK2				PIK3AP1				MARK2				GJA3				DHX8				KCNC1				UMPS
CACHD1	C1R	DSCAML1		DSCAML1	CASP3	SRC		SST	CD83				DYRK3				PIK3R1				MAST1				GJB2				DLD				KCND1				VAMP2
CALR	C1RL	DSTYK		DSTYK	CASP4	SST		STAT1	CD86				DYRK4				PIK3R2				MAST3				GLI3				DPYS				KCNF1
CAMK1	C1S	DYRK2		DYRK2	CASP5	STAT1		SYT1	CDC27				EEF2K				PIK3R3				MASTL				GMNN				DPYSL3				KCNG2
CAMK1D	C20orf114	DYRK4		DYRK4	CASP6	SYT1		TBP	CDC42				EGFR				PKDCC				MATK				GMPS				DZIP3				KCNQ3
CAMK1G	C20orf185	EBI3		EBI3	CASP7	TBP		TF	CDC42BPA				EGR2				PLCG1				MEIS2				GOSR2				E2F1				KCNS2
CAMK2A	C20orf186	ECE1		ECE1	CASP8	TF		TGFA	CDC42BPB				EIF2AK1				PLCG2				MELK				GRK5				ECEL1				KCNV1
CAMK2B	C20orf70	EDA2R		EDA2R	CASP9	TGFA		TGFB1	CDC42BPG				EIF2AK2				PLK4				MET				HAND1				EFTUD2				KEL
CAMK2D	C20orf71	EDN1		EDN1	CASQ2	TGFB2		TGFB2	CDC7				EIF2AK3				PMCH				MKKS				HAND2				EIF4A3				KIF17
CAMK2G	C3AR1	EFTUD2		EFTUD2	CBL	THBS2		THBS2	CDH2				EIF2AK4				POU2AF1				MKNK1				HDAC1				ELP3				LDLR
CAMK4	C3P1	EGF		EGF	CBLB	TNF		TNF	CDK1				ENPP3				PRKCA				MNX1				HDAC2				EMD				LDLRAP1
CAMKK1	C4A	EGFR		EGFR	CCL19	TNFRSF11A		TNFRSF11A	CDK10				ERN1				PRKCB				MOS				HES6				ENPEP				LIPC
CAMKK2	C4B	EGR1		EGR1	CCL2	TNFRSF11B		TNFRSF11B	CDK11A				ERN2				PRKCD				MTA1				HEY2				ERAP1				LNPEP
CAMKV	C4BPA	EIF2AK3		EIF2AK3	CCL3	TNFSF10		TNFSF10	CDK11B				ETFB				PRKCE				MTMR1				HMOX1				ERCC1				LOC647859
CAMP	C4BPB	EIF2AK4		EIF2AK4	CCL4	TNK1		TNK1	CDK12				FADD				PRKCQ				MTMR2				HMX3				ERCC4				LOC729991-MEF2B
CANX	C5	ELANE		ELANE	CCL7	TP53		TP53	CDK13				FAP				PRKD1				MTSS1				HNF1B				ESR1				LOC732415
CAPNS1	C6	ELP2		ELP2	CCNE2	TP53RK		TP53RK	CDK14				FAS				PRKD3				MYLK4				HNF4A				ESR2				LPA
CARD10	CA9	ENG		ENG	CCT2	TRADD		TRADD	CDK15				FASLG				PRKX				MYOD1				HOXA11				ETFDH				LPL
CARD11	CACNA1D	EPHA2		EPHA2	CCT3	TTBK2		TTBK2	CDK16				FEN1				PTGS2				NBR1				HOXD12				EXOSC6				LRP10
CARD14	CADPS	EPHB4		EPHB4	CCT4	VAV1		VAV1	CDK17				FKBP8				PTK2				NCOR2				HPRT1				FADD				LRP12
CARD17	CADPS2	EPO		EPO	CCT5	VAV2		VAV2	CDK18				FLT3LG				PTK2B				NEK11				HRAS				FAS				LRP2
CARD8	CALCA	ERBB2		ERBB2	CCT6A	VAV3		VAV3	CDK19				GAK				PTPN6				NEK4				HSPG2				FASN				LRP3
CARM1	CALR	ERBB3		ERBB3	CCT6B	WEE2		WEE2	CDK2				GDNF				PTPRC				NEK9				ICAM2				FMO1				LRP4
CASK	CALU	ERCC3		ERCC3	CCT7	YES1		YES1	CDK20				GFM1				PTPRZ1				NFE2L3				IGFBP3				FMO2				LRPAP1
CASP10	CAMK1D	ERN2		ERN2	CCT8	ZAP70		ZAP70	CDK3				GGT1				PXN				NFE2L1				ILK				FMO3				LTF
CASP2	CAMK1G	ESR1		ESR1	CCT8L2				CDK4				GGT2				RAC1				NKX2-1				IMPG1				FMO4				MAPK7
CASP3	CAMK2D	ESR2		ESR2	CD14				CDK5				GGT7				RAC2				NKX2-5				IMPG2				FMO5				MAPK8IP1
CASP4	CAMKK1	ETS1		ETS1	CD19				CDK5R1				GGTLC1				RAF1				NKX2-8				INSR				FMO6P				MAPT
CASP5	CARD8	ETS2		ETS2	CD1A				CDK5RAP2				GGTLC2				RAG2				NKX3-2				IRS1				FMO9P				MDM2
CASP7	CASP10	EXOSC10		EXOSC10	CD1D				CDK6				GLRX				RASA1				NLK				ISL1				GDAP2				MEF2A
CASP8	CASP3	F2R		F2R	CD2				CDK7				GPD1				RET				NTRK2				ITGB1BP3				GMPS				MEF2C
CASP9	CASP8	FADD		FADD	CD22				CDK8				GPX4				ROCK1				NTRK3				ITPR3				GNAZ				MEP1A
CAV1	CAV1	FAS		FAS	CD226				CDK9				GPX5				ROS1				NUAK2				KAL1				GNB1				MEP1B
CAV3	CAV2	FASLG		FASLG	CD24				CDKL1				GRK1				RPS6KA1				ONECUT1				KDR				GOLGA5				MME
CBFB	CCK	FBN1		FBN1	CD244				CDKL2				GRK4				RPS6KA2				ONECUT2				KLF5				GPI				MMP1
CBL	CCL11	FBXW7		FBXW7	CD28				CDKL3				GRK5				RYK				OTX1				KRT10				GRIA2				MMP10
CBX8	CCL16	FES		FES	CD34				CDKL4				GRK6				SELPLG				OTX2				KRT14				GRIN1				MMP11
CCL11	CCL17	FGF1		FGF1	CD36				CDKL5				GRK7				SGK223				PAK3				LAMA1				GRIN2A				MMP12
CCL15	CCL18	FGF18		FGF18	CD3E				CDO1				GRPEL2				SH2B2				PAK4				LAMA2				GSR				MMP13
CCL16	CCL2	FGF2		FGF2	CD4				CEP290				GSG2				SH2B3				PAK6				LAMA3				H2AFY				MMP14
CCL17	CCL20	FGF3		FGF3	CD40				CEP70				GSK3A				SH3BP2				PARD6A				LAMA4				H2AFY2				MMP15
CCL19	CCL21	FGFR1		FGFR1	CD44				CERKL				GSK3B				SHC1				PASK				LAMA5				HCN2				MMP17
CCL2	CCL3	FGFR2		FGFR2	CD48				CGN				GSR				SHC2				PAX3				LAMB1				HCN4				MMP19
CCL20	CCL4	FGFR3		FGFR3	CD5				CHEK1				HAT1				SIK1				PAX6				LAMB2				HOOK1				MMP2
CCL21	CCL5	FGFR4		FGFR4	CD55				CHEK2				HDAC1				SIT1				PAX7				LAMB3				HRAS				MMP20
CCL22	CCL7	FIGF		FIGF	CD58				CHID1				HDAC2				SLA				PAX8				LAMC1				ILF2				MMP21
CCL24	CCL8	FLT1		FLT1	CD59				CHIT1				HDAC3				SLA2				PBK				LAMC3				INTS1				MMP23B
CCL26	CCND1	FLT3		FLT3	CD68				CHKA				HDAC4				SNCA				PBX1				LBX1				ISY1				MMP24
CCL3	CD14	FLT3LG		FLT3LG	CD69				CHMP4A				HIF1A				SRC				PBX2				LDLR				ITIH1				MMP25
CCL4	CD163L1	FLT4		FLT4	CD7				CHUK				HIPK1				STAP2				PBX3				LHX1				ITIH4				MMP26
CCL5	CD19	FN1		FN1	CD74				CIT				HIPK2				STAT1				PBX4				LHX2				ITIH5				MMP27
CCL7	CD28	FOS		FOS	CD80				CLASP1				HIPK3				STAT3				PDGFRA				LHX6				ITPR1				MMP28
CCND1	CD2AP	FOSB		FOSB	CD83				CLASP2				HIPK4				STAT4				PDPK1				LHX8				KCNA1				MMP3
CCND2	CD34	FOSL1		FOSL1	CD86				CLINT1				HSD3B1				STAT5A				PDRG1				LMX1B				KCNA10				MMP7
CCNT1	CD3E	FRS2		FRS2	CD8A				CLIP1				HSP90AA1				STAT6				PFDN2				LOC645508				KCNA2				MMP8
CCR1	CD4	FURIN		FURIN	CD8B				CLK1				HSPD1				STK24				PHKG1				LOC647275				KCNA3				MMP9
CCR5	CD40	FYN		FYN	CD96				CLK2				HUNK				TLR4				PHKG2				LOX				KCNA4				MRPL21
CCR7	CD40LG	GAK		GAK	CDC42				CLK2P				ICK				TNF				PIM1				LRP1				KCNA5				MSN
CCR8	CD44	GHRH		GHRH	CDC42BPA				CLK3				IDH1				TNFSF11				PITX2				LRP10				KCNA6				MTOR
CD14	CD46	GPI		GPI	CDC42BPB				CLK4				IFNA17				TNK1				PKN3				LRP2				KCNA7				MUTYH
CD160	CD5	GRB2		GRB2	CDH1				CLTA				IFNA6				TP53RK				PKNOX1				LRP3				KCNB1				MYC
CD163	CD6	GRK1		GRK1	CDH2				CLTB				IFNA8				TRAF6				PLK4				LUM				KCNB2				MYCL1
CD163L1	CD69	GRK7		GRK7	CDK5R1				CLTC				IFNAR2				TYK2				PLK5P				MALL				KCNC1				MYCN
CD180	CD80	GSK3A		GSK3A	CELF2				CLTCL1				IFNB1				TYROBP				PML				MAPK3				KCNC2				MYEF2
CD19	CDC42	GSK3B		GSK3B	CELF5				CLYBL				IFNG				VAV1				PNCK				MAT2A				KCNC3				MYF5
CD1A	CDC42BPA	GTF2E2		GTF2E2	CES1				CNDP1				IKBKB				VAV2				POLR2L				MATN1				KCNC4				MYF6
CD1C	CDC42BPB	GTF2F1		GTF2F1	CETP				CNR2				IKBKE				VAV3				PPFIA1				MATN3				KCND1				MYOD1
CD1D	CDC42BPG	HAND1		HAND1	CFB				CNTFR				IL10				VWF				PPFIA2				MCAT				KCND2				MYOG
CD1E	CDC42EP4	HAND2		HAND2	CFLAR				COL25A1				IL12B				WAS				PPFIA3				MECOM				KCND3				NAA30
CD2	CDC7	HES1		HES1	CGN				COPB1				IL19				WEE2				PRKAA1				MEIS1				KCNF1				NAALAD2
CD200	CDH1	HEY1		HEY1	CGNL1				CPNE3				IL22				YES1				PRKCA				MEOX1				KCNG1				NCOA2
CD207	CDH5	HGF		HGF	CH25H				CREBBP				IL24				ZAP70				PRKCE				MEOX2				KCNG2				NCOR2
CD22	CDK1	HIF1A		HIF1A	CHKA				CRHR1				IL26								PRKCI				MFAP2				KCNG3				NEFL
CD24	CDK11A	HIPK1		HIPK1	CHN1				CRKL				IL28A								PRKCQ				MFAP5				KCNG4				NF2
CD247	CDK11B	HIPK2		HIPK2	CHRNA2				CSF1R				IL28B								PRKCZ				MGP				KCNH1				NFATC1
CD27	CDK12	HLF		HLF	CHRNA4				CSK				IL29								PRKD3				MITF				KCNH2				NFATC2
CD274	CDK13	HPN		HPN	CHRNA6				CSNK1A1				IL6								PRKG1				MMP11				KCNH4				NGFRAP1
CD28	CDK14	HSP90B1		HSP90B1	CHRNB2				CSNK1A1L				ILK								PROP1				MMP14				KCNMA1				NID1
CD2AP	CDK17	HSPA5		HSPA5	CHRNB3				CSNK1D				IRAK1								PRPF4B				MRI1				KCNQ1				NID2
CD33	CDK18	HUNK		HUNK	CHRNE				CSNK1E				IRAK2								PRRX2				MSX1				KCNQ2				NKX2-5
CD34	CDK2	ICAM1		ICAM1	CHRNG				CSNK1G1				IRAK3								PSKH2				MSX2				KCNQ3				NOS1AP
CD36	CDK20	ICAM2		ICAM2	CHUK				CSNK1G2				IRAK4								PTEN				MTA1				KCNQ4				NR4A1
CD37	CDK3	IFNB1		IFNB1	CLINT1				CSNK1G3				ISCU								PTK7				MUC2				KCNQ5				NRG1
CD3D	CDK4	IFNG		IFNG	CLTCL1				CSNK2A1				JUP								PTP4A2				MUC4				KCNS1				OCLN
CD3E	CDK5	IGF1		IGF1	CLTL				CSNK2A2				KALRN								PTP4A3				MUC5AC				KCNS2				OLR1
CD3G	CDK6	IGF1R		IGF1R	CLUAP1				CTBS				KARS								PTPN1				MYB				KCNS3				PAFAH1B1
CD4	CDK8	IGF2		IGF2	CNGA2				CTNNA1				KATNB1								PTPN18				MYC				KCNV1				PAPLN
CD40LG	CDKL1	IGF2R		IGF2R	CNTF				CTNNA3				KIAA1804								PTPN20A				MYF5				KCNV2				PAPPA
CD44	CDKL2	IKBKB		IKBKB	COG2				CTNNB1				KIF1A								PTPN21				MYLIP				KDM4A				PARD6B
CD48	CEACAM1	IL10		IL10	COPB1				CTSA				KIF3A								PTPN22				MYO9B				KEL				PAX3
CD53	CEBPB	IL11		IL11	COPS5				CTSC				KIF3B								PTPRA				MYOD1				KNG1				PAX7
CD59	CEL	IL13		IL13	CP				CTTN				KIF3C								PTPRC				MYOG				KRAS				PDGFB
CD5L	CELA2B	IL15		IL15	CPEB1				CUTA				KLC3								PTPRE				NCK1				KSR1				PDGFRB
CD63	CELA3A	IL16		IL16	CPSF6				CXCR4				KPNB1								PTPRF				NCOR1				KSR2				PHACTR3
CD68	CELA3B	IL17A		IL17A	CR2				CYB5B				KSR1								PTPRG				NCOR2				LASP1				PHEX
CD69	CELSR1	IL17F		IL17F	CREB1				CYP17A1				KSR2								PTPRK				NELL2				LBR				PISD
CD7	CFD	IL18		IL18	CREBBP				DAB1				LATS1								PTPRN				NEU3				LIAS				PLAT
CD70	CFHR	IL18BP		IL18BP	CRH				DAPK1				LATS2								PTPRN2				NEUROG1				LMNA				PLAU
CD72	CFLAR	IL1A		IL1A	CRK				DAPK2				LDHA								PTPRO				NF2				LNPEP				PLAUR
CD74	CFP	IL1B		IL1B	CRKL				DAPK3				LIMK1								PTPRQ				NGFR				LNX1				PM20D1
CD79A	CGA	IL1R1		IL1R1	CSF1				DAPP1				LIMK2								PTPRR				NID1				LOC407835				POU2F1
CD79B	CGB	IL1R2		IL1R2	CSF1R				DBN1				LMTK2								PTPRS				NID2				LOC642721				PPARGC1A
CD83	CHEK2	IL1RAP		IL1RAP	CSK				DBNL				LMTK3								PTPRT				NKX2-1				LOC652710				PPARGC1B
CD84	CHGB	IL1RAPL2		IL1RAPL2	CSNK2A1				DBT				LOC651008								PTPRU				NKX2-5				LOC729117				PPP1CA
CD8A	CHN1	IL1RL2		IL1RL2	CSTF2				DCLK1				LOC653052								RAF1				NKX3-1				LOC732415				PRDM2
CD8B	CHUK	IL2		IL2	CTGF				DCLK2				LOC729991-MEF2B								RAX				NME1-NME2				LSM2				PRKCI
CD9	CIT	IL24		IL24	CTNNA1				DCLK3				LOC731751								RET				NOS1				LSM4				PSEN1
CDA	CLEC14A	IL2RG		IL2RG	CTNNA3				DCX				LRRK1								RHOXF2				NOS2				LSM7				PSEN2
CDC25A	CLEC18B	IL4		IL4	CTNNAL1				DGKB				LRRK2								RIPK4				NOS3				MAP2K1				RAB5A
CDC25B	CLEC3B	IL5		IL5	CTNNB1				DGKI				MAK								ROCK1				NOSTRIN				MAP2K2				RALGAPB
CDC42BPA	CLK3	IL6		IL6	CTNND2				DGKK				MAP2K1								ROCK2				NPC1				MAPK1				RAP1GAP
CDC42BPB	CLPP	IL6R		IL6R	CTSB				DHODH				MAP2K2								RPS6KA2				NPC1L1				MAPK3				RASA1
CDC42BPG	CLPX	IL7		IL7	CTSL1				DLAT				MAP2K3								RPS6KA4				NR2F2				MDM2				RBFOX2
CDC6	CNOT6	IL8		IL8	CTTN				DLSTP1				MAP2K4								RPS6KA6				NTRK1				MECR				RBM14
CDC7	CNTF	ILK		ILK	CX3CL1				DMPK				MAP2K5								RPS6KB2				NXF1				MEP1A				RDX
CDK1	COBRA1	INS		INS	CXCL12				DNAJC6				MAP2K6								RPS6KC1				OLR1				MEP1B				RELN
CDK10	COL11A1	INSR		INSR	CXCL13				DNM1				MAP2K7								SBK2				ONECUT1				METTL10				RET
CDK11A	COL11A2	IRAK1		IRAK1	CXCL2				DNM2				MAP3K1								SIK1				ONECUT2				METTL7B				RHEB
CDK11B	COL12A1	IRS1		IRS1	CXCL3				DOC2A				MAP3K10								SIK2				ONECUT3				MGRN1				RNPEP
CDK12	COL13A1	IRS2		IRS2	CXCR4				DOC2B				MAP3K11								SIX1				OPTC				MIB1				ROS1
CDK13	COL14A1	ITGA2B		ITGA2B	CYFIP1				DOK1				MAP3K12								SIX3				OTX1				MLLT4				RPS6
CDK14	COL15A1	ITGA5		ITGA5	CYLD				DOK2				MAP3K13								SMAD1				OTX2				MME				RPS6KB1
CDK15	COL16A1	ITGA9		ITGA9	DAB1				DPYSL2				MAP3K14								SMAD5				OXSM				MMP1				SCARF1
CDK16	COL18A1	ITGAM		ITGAM	DAB2				DSTYK				MAP3K15								SMARCA5				OXTR				MMP10				SCP2
CDK17	COL19A1	ITGB1		ITGB1	DAXX				DUS4L				MAP3K2								SMARCC1				PAT1A				MMP11				SERPINA1
CDK18	COL1A1	ITGB2		ITGB2	DBN1				DYNC1I1				MAP3K3								SMARCC2				PAX1				MMP12				SERPINB2
CDK19	COL1A2	ITGB3		ITGB3	DBNL				DYRK1A				MAP3K4								SQSTM1				PAX2				MMP13				SERPINE1
CDK2	COL23A1	ITK		ITK	DCC				DYRK1B				MAP3K5								SRC				PAX3				MMP14				SHC1
CDK20	COL24A1	JAG1		JAG1	DDIT3				DYRK2				MAP3K6								SRPK1				PAX6				MMP15				SLC2A1
CDK3	COL27A1	JAK2		JAK2	DDR1				DYRK3				MAP3K7								STAT3				PAX7				MMP17				SMAD1
CDK4	COL2A1	JAK3		JAK3	DDR2				DYRK4				MAP3K8								STK17B				PAX8				MMP19				SMAD5
CDK5	COL3A1	JUN		JUN	DLG4				ECHDC2				MAP3K9								STK24				PAX9				MMP2				SMAD9
CDK6	COL4A1	JUNB		JUNB	DLGAP3				ECHDC3				MAP4K1								STK32B				PBX1				MMP20				SORL1
CDK7	COL4A2	JUND		JUND	DMD				ECHS1				MAP4K2								STK33				PCNA				MMP21				SP1
CDK8	COL4A3	KDR		KDR	DMPK				EEA1				MAP4K3								STK40				PDGFRA				MMP23B				SPOCK2
CDK9	COL4A4	KHDRBS1		KHDRBS1	DNAH11				EEF2K				MAP4K4								TAOK1				PDX1				MMP24				SPOCK3
CDKL1	COL4A5	KIT		KIT	DNAJC10				EGFR				MAP4K5								TAOK2				PGM5				MMP25				SRF
CDKL2	COL4A6	KSR1		KSR1	DNM1				EIF2AK1				MAPK1								TBK1				PHOX2A				MMP26				SRSF2
CDKL3	COL5A1	LBP		LBP	DNM1L				EIF2AK2				MAPK10								TBPL1				PITX2				MMP27				TCF3
CDKL4	COL5A2	LCK		LCK	DNM2				EIF2AK3				MAPK11								TCF3				PITX3				MMP28				TCF4
CDKL5	COL5A3	LDLR		LDLR	DNMBP				EIF2AK4				MAPK12								TLK2				PLAA				MMP3				TEAD1
CDKN1A	COL6A1	LEP		LEP	DPH5				EIF2B5				MAPK13								TLX1				PLD1				MMP7				THBS1
CDKN1B	COL6A2	LIF		LIF	DST				ENO2				MAPK14								TLX2				PNP				MMP8				THBS2
CDKN2A	COL6A3	LIMK2		LIMK2	DYNC1H1				EPHA1				MAPK15								TLX3				PNPT1				MMP9				THSD4
CDKN2B	COL7A1	LIPE		LIPE	DYNC1I1				EPM2A				MAPK3								TNIK				POLR2L				MPHOSPH10				TIMP1
CDX2	COL8A2	LMTK2		LMTK2	DYNLL2				EPN1				MAPK4								TRIO				POSTN				MPHOSPH8				TIMP2
CEACAM5	COL9A1	LMTK3		LMTK3	EDEM1				EPN2				MAPK6								TRPM6				POU1F1				MRAS				TIMP3
CEACAM8	COL9A2	LOC651008		LOC651008	EDN1				EPN3				MAPK7								TSHZ1				POU2F2				MT3				TIMP4
CEBPA	COL9A3	LRP1		LRP1	EEF1A1				EPS15				MAPK8								TSHZ2				POU3F3				MTHFR				TJP1
CEBPB	COLEC10	LRPAP1		LRPAP1	EEF1A2				ERN1				MAPK9								TSHZ3				POU4F1				MUSK				TLL1
CEBPD	COLQ	LRRK2		LRRK2	EEF2				ERN2				MAPKAPK2								TSSK1A				PPIL1				MYCL1				TLL2
CEBPG	COMP	LTA		LTA	EFEMP1				ESPN				MAPKAPK3								TSSK4				PRELP				MYCN				TRHDE
CERK	CORIN	LTBP4		LTBP4	EFHC1				ESR1				MAPKAPK5								TTBK2				PRKCG				MYST1				TRPC3
CFB	COX11	LTK		LTK	EFNA1				ETFDH				MAPRE2								UHMK1				PRNP				NARF				TRPC5
CFI	CPM	MAFB		MAFB	EFNA2				EVL				MAPRE3								ULK4				PROX1				NDUFS8				TRPM1
CFLAR	CPN1	MAFF		MAFF	EFNA4				FAS				MAPT								VAX2				PROX2				NFASC				TRPM6
CFTR	CPSF3L	MAFG		MAFG	EFNB1				FCCG2B				MARK1								VRK1				PRRX2				NHP2L1				TRPM7
CHEK1	CR1	MAK		MAK	EFNB2				FCGRT				MARK2								WEE2				PTGS1				NT5C				TRPV1
CHEK2	CR2	MAP2K1		MAP2K1	EFS				FCN2				MARK3								WNK1				PTGS2				NT5C1A				TRPV2
CHKA	CREB1	MAP2K3		MAP2K3	EFTUD2				FEZ1				MARK4								WNK2				PTK2				NT5DC1				TRPV3
CHUK	CREB3	MAP2K4		MAP2K4	EGF				FGR				MAST1								YES1				PTPN1				NT5DC2				TRPV4
CIB1	CREB3L1	MAP2K6		MAP2K6	EGFR				FIGN				MAST2								YWHAB				PTRF				NT5DC3				TRPV5
CIITA	CREB3L4	MAP4K3		MAP4K3	EIF1AX				FIGNL1				MAST3								YWHAE				QPRT				NUDT21				TRPV6
CISH	CREB5	MAPK12		MAPK12	EIF2B1				FLJ45422				MAST4								YWHAG				RAB5A				PAPLN				TSC2
CIT	CREBBP	MAPK3		MAPK3	EIF2B5				FUCA1				MASTL								YWHAH				RAC1				PAPPA				TTC38
CITED1	CREM	MAPKAPK3		MAPKAPK3	EIF2S1				FYN				MCTP1								YWHAQ				RAF1				PCGF2				VARS
CITED4	CRH	MAPKAPK5			EIF2S2				GAA				MCTP2								YWHAZ				RASA1				PDC				VARS2
CKM	CRIM1	MATK			EIF2S3				GAB1				MDH2								ZAK				RAX				PECR				VCAN
CLK1	CRKL	MDK		MDK	EIF3E				GAB2				MEF2A								ZAP70				RB1				PGR				VEGFA
CLK2	CRP	MELK		MELK	EIF4B				GABARAP				MEF2D								ZFHX3				RHOA				PHEX				VGLL2
CLK2P	CSF1	MET		MET	EIF4G1				GABRA1				MELK												RUNX1				PIK3CA				VHL
CLK3	CSF1R	MIF		MIF	EIF4G2				GALC				MGC42105												RUNX1T1				PJA2				VLDLR
CLK4	CSF2	MKNK1		MKNK1	EIF4G3				GALK1				MINK1												RUNX3				PLRG1				VTN
CLOCK	CSF3	MMP10		MMP10	EIF5				GAP43				MKNK1												S1PR1				PLS3				YWHAB
CNTF	CSH2	MMP2		MMP2	EIF5A				GART				MKNK2												SALL1				PNP				YWHAE
CNTFR	CSK	MMP23B		MMP23B	EIF5A2				GBA2				MOS												SCARB1				PPAT				YWHAG
CNTN2	CSNK1A1	MMP3		MMP3	EIF5B				GBA3				MST4												SCP2				PPIE				YWHAH
COL4A3BP	CSNK1A1L	MMP9		MMP9	ELAVL4				GCDH				MT3												SEC61A1				PPIH				YWHAQ
COL6A3	CSNK1E	MOS		MOS	ELF3				GFAP				MYLK3												SEC61A2				PPIL1				YWHAZ
COPS2	CSNK1G3	MSH2		MSH2	ELP3				GFM1				MYLK4												SFTPD				PPIL3
COQ10B	CSNK2A2	MSR1		MSR1	EMG1				GFRA1				MYO3B												SGCE				PPP2CA
CORIN	CSTF2	MTOR		MTOR	ENAH				GFRA2				NDUFA1												SHC1				PPP2CB
COX1	CTDP1	MUSK		MUSK	ENO1				GFRA3				NEFH												SHH				PPWD1
COX10	CTDSP1	MYB		MYB	EP300				GLB1				NEFL												SIRT5				PRPF18
COX11	CTDSPL	MYLK4		MYLK4	EPB41				GLDC				NEFM												SIX3				PRPF19
COX15	CTF1	MYD88		MYD88	EPB41L2				GOSR1				NEK1												SIX4				PRPF3
COX17	CTGF	MYO3A		MYO3A	EPB41L3				GOSR2				NEK10												SIX5				PRPF31
COX2	CTHRC1	NCOR2		NCOR2	EPB42				GRB2				NEK11												SKIL				PRPF4
COX3	CTNNB1	NEK1		NEK1	EPHA2				GRIA2				NEK2												SLIT3				PRPF4B
COX4I1	CTPS	NEK6		NEK6	EPHA5				GRIN2B				NEK3												SMAD1				PRPF6
COX5A	CTPS2	NEK8		NEK8	EPHA8				GRK1				NEK4												SMAD4				PRPF8
CPD	CTRB1	NFATC1		NFATC1	EPHB4				GRK4				NEK5												SMARCA5				PRSS1
CPSF3L	CTRL	NFATC2		NFATC2	EPHB6				GRK5				NEK6												SMARCC1				PTCH1
CR2	CTSS	NFE2L3		NFE2L3	EPN1				GRK6				NEK7												SMARCC2				PTGR1
CRADD	CUBN	NFKBIA		NFKBIA	EPN2				GRK7				NEK8												SNAP23				PUF60
CREB1	CUL5	NFX1		NFX1	EPN3				GRPEL1				NEK9												SNAPC4				RAB1A
CREB3	CXCL1	NFYC		NFYC	EPORR				GRPEL2				NELL2												SNAPIN				RAB1B
CREB3L1	CXCL10	NGF		NGF	EPS15				GSG2				NFATC1												SOCS1				RAB21
CREB3L2	CXCL12	NGFR		NGFR	EPS15L1				GSK3A				NFKBIA												SORL1				RAB27A
CREB3L3	CXCL2	NKX2-5		NKX2-5	ERBB2				GSK3B				NFS1												SOX10				RAB2A
CREB3L4	CXCL3	NOD1		NOD1	ERBB3				GUSB				NLK												SOX9				RAB34
CREB5	CXCL5	NODAL		NODAL	ERO1LB				HAAO				NME1-NME2												SP1				RAB5A
CREBBP	CXCL6	NOTCH1		NOTCH1	ESAM				HADHA				NME3												SPARC				RAB6B
CREM	CXCR4	NOTCH2		NOTCH2	ESPN				HAL				NOS1												SRC				RAB8B
CRHR2	CYP21A2	NRG1		NRG1	ESR1				HDAC6				NR4A1												SRF				RABPC1
CRK	CYR61	NTN1		NTN1	ESR2				HEXA				NRK												SRM				RAD18
CRKL	CYTB	NTRK1		NTRK1	ETF1				HEXB				NUAK1												SRP54				RAF1
CRLF1	DAB2	NTRK2		NTRK2	ETV6				HFE				NUAK2												STOM				RAP1A
CRLF2	DAGLA	NTRK3		NTRK3	EWSR1				HIP1				OBSCN												STOML3				RAP1B
CRP	DAGLB	NUAK2		NUAK2	EXOSC2				HIPK1				OPA1												STRN4				RBBP6
CSDA	DAPK2	OBSCN		OBSCN	EXOSC4				HIPK2				OSM												TBX2				RBM17
CSE1L	DAPP1	OSM		OSM	EXOSC8				HIPK3				OXSR1												TBX20				RBM22
CSF1	DAXX	OXSR1		OXSR1	EXOSC9				HIPK4				PAK1												TBX5				RBM39
CSF1R	DBNL	PAK1		PAK1	EZR				HLA-A				PAK2												TCF4				RBM8A
CSF2	DCAF12	PAK4		PAK4	F2R				HLA-B				PAK3												TECTA				RBMX
CSF2RB	DDAH2	PAK6		PAK6	FA				HLA-DMA				PAK4												TERF2				RET
CSF3	DDR2	PASK		PASK	FABP1				HLA-DMB				PAK6												TERF2IP				RIMS1
CSF3R	DDX17	PBK		PBK	FABP6				HLA-DOA				PAK7												TFEB				RND3
CSK	DDX20	PCNA		PCNA	FADD				HLA-DOB				PASK												TFPI2				RNF111
CSNK1A1	DDX23	PDGFA		PDGFA	FARP2				HLA-DPA1				PBK												TFRC				RNF123
CSNK1A1L	DDX24	PDGFB		PDGFB	FASLG				HLA-DPB1				PDIK1L												TGFBI				RNF128
CSNK1D	DDX43	PDGFRA		PDGFRA	FBLIM1				HLA-DQA1				PDPK1												TGFBR1				RNF138
CSNK1E	DDX5	PDGFRB		PDGFRB	FBLN1				HLA-DQA2				PDPK2												THBS1				RNF144A
CSNK1G1	DFFA	PDPK1		PDPK1	FBN1				HLA-DQB1				PGCP												THBS2				RNF144B
CSNK1G2	DGCR2	PECAM1		PECAM1	FCGR3A				HLA-DQB2				PGK1												THBS3				RNF149
CSNK1G3	DGCR6	PGF		PGF	FERMT1				HLA-DRB1				PHKG1												THBS4				RNF19B
CSNK2A1	DGKD	PGK1		PGK1	FERMT3				HLA-DRB2				PHKG2												TIMP3				RNF2
CSNK2A2	DGKH	PHKG1		PHKG1	FES				HLA-DRB3				PHYH												TLE4				RNF20
CSNK2B	DGKK	PHKG2		PHKG2	FEZ1				HLA-DRB4				PIK3C2A												TLX1				RNF25
CTF1	DHX8	PIAS1		PIAS1	FGB				HLA-DRB5				PIK3C2B												TLX2				RNF41
CTLA4	DIABLO	PIAS2		PIAS2	FGF2				HLA-DRB5				PIK3C2G												TLX3				RNF5
CTNNB1	DIS3	PIK3CG		PIK3CG	FGFR2				HLA-E				PIK3R4												TNFRSF1B				RNPEP
CTSS	DLK6	PKN3		PKN3	FGFR3				HLA-F				PIM1												TNR				RNPS1
CXADR	DLL1	PLAT		PLAT	FGFR4				HLA-G				PIM2												TPD52				RPIA
CXCL1	DLL3	PLAU		PLAU	FGR				HLA-H				PIM3												TRADD				RRAS
CXCL10	DLL4	PLK4		PLK4	FLNA				HLCS				PINK1												TRAF6				RRAS2
CXCL11	DMC1	PMCH		PMCH	FLT1				HMGCL				PKMYT1												TRPC1				RUNX1
CXCL12	DMP1	PML		PML	FLT3				HMGCLL1				PKN1												TSHZ1				RYR1
CXCL13	DOM3Z	PNCK		PNCK	FMR1				HOOK1				PKN2												TSHZ2				RYR2
CXCL2	DSCAML1	POLR2A		POLR2A	FNBP1L				HOOK2				PKN3												TSHZ3				RYR3
CXCL3	DSTYK	POMC		POMC	FNBPI				HOOK3				PLK1												TTR				SART1
CXCL5	DTX2	PRKCA		PRKCA	FOS				HPSE				PLK2												TYR				SCN1B
CXCL6	DTX4	PRKCE		PRKCE	FRK				HRAS				PLK3												UMPS				SCN4A
CXCL9	DYRK2	PRKCI		PRKCI	FSCN1				HSD17B10				PLK4												USH2A				SCN5A
CXCR3	DYRK4	PRKD1		PRKD1	FSCN2				HSD17B8				PLK5P												UTRN				SCN8A
CXCR4	EBI3	PRKD2		PRKD2	FURIN				HSPA8				PNCK												VAV1				SDHA
CXCR5	ECE1	PRKD3		PRKD3	FXR1				HTRA2				PPP3CA												VAX2				SDHB
CYBB	ECM1	PRKG1		PRKG1	FYB				HTT				PPP3CB												VCAN				SEPT7L
CYLD	EDA2R	PRKG2		PRKG2	FYN				HUNK				PPP3CC												VEGFA				SEPT7P2
CYP11A1	EDIL3	PRKX		PRKX	G3BP2				ICK				PRDX1												VENTX				SERPINB2
CYP17A1	EDN1	PRL		PRL	GAA4				IDUA				PRDX2												VLDLR				SF1
CYP1A2	EDN3	PROX1		PROX1	GAB1				IGF2R				PRDX3												VSX2				SF3A1
CYP1B1	EEF2	PRPF4B		PRPF4B	GAB3				IKBKB				PRDX4												WNT2				SF3A2
CYP21A2	EFEMP1	PSMB8		PSMB8	GABBR2				IKBKE				PRDX5												WT1				SF3A3
CYP26A1	EFEMP2	PTGS2		PTGS2	GAK				ILK				PRDX6												ZBTB32				SF3B1
CYP26B1	EFNA1	PTH		PTH	GALM				INA				PREP												ZFPM1				SF3B2
CYP26C1	EFNB1	PTK2		PTK2	GAS1				INPP5A				PREPL												ZFYVE9				SF3B3
CYP27A1	EFNB2	PTK2B		PTK2B	GAS7				INPP5E				PRKAA1												ZNF202				SF3B4
CYP2A13	EFTUD2	PTN		PTN	GBE1				IRAK1				PRKAA2												ZNF24				SFPQ
CYP2B6	EGF	PTPN13		PTPN13	GC				IRAK2				PRKACA												ZNF263				SHOC2
CYP2C18	EGFL8	PTPN6		PTPN6	GCNT2				IRAK3				PRKACB												ZNF274				SHPRH
CYP2C19	EGFR	PTTG1		PTTG1	GFAP				IRAK4				PRKACG												ZNF396				SIP1
CYP2C9	EGR1	RAC1		RAC1	GFI1B				ITGB3				PRKCA																SKIV2L2
CYP2D6	EHMT2	RAF1		RAF1	GFRA2				IVD				PRKCB																SLC35F5
CYP2F1	EIF2AK3	RAGE		RAGE	GGA1				JAK1				PRKCD																SLU7
CYP2J2	EIF2AK4	RBPJ		RBPJ	GGA2				JAK3				PRKCE																SMAD2
CYP2R1	EIF2S3	RELN		RELN	GGA3				KALRN				PRKCG																SMAD4
CYP3A4	EIF4E	RET		RET	GHRH				KATINA1				PRKCH																SMARCA2
CYP3A43	EIF5B	RGS19		RGS19	GLA				KATNAL1				PRKCI																SMARCA4
CYP3A5	ELANE	RIPK1		RIPK1	GLI1				KATNB1				PRKCQ																SMARCA5
CYP3A7	ELAVL1	RIPK4		RIPK4	GLIS2				KIAA0528				PRKCZ																SMARCAD1
CYP46A1	ELN	ROBO1		ROBO1	GLRA2				KIAA1804				PRKD1																SMARCC1
CYP4A11	ELP2	ROCK1		ROCK1	GNA11				KIF1B				PRKD2																SMARCC2
CYP4A22	EMID1	ROCK2		ROCK2	GPC3				KIF5B				PRKD3																SMNDC1
CYP4B1	EMID2	ROS1		ROS1	GRAP2				KLC3				PRKDC																SNRNP200
CYP4F11	EMILIN1	RPA2		RPA2	GRAPL				KMO				PRKG1																SNRNP40
CYP4F12	EMILIN2	RPS6KB2		RPS6KB2	GRB2				KRT1				PRKG2																SNRNP70
CYP4F2	ENG	RPS6KC1		RPS6KC1	GRIA1				KRT18				PRKX																SNRPA
CYP4F22	ENPEP	RYK		RYK	GRIA2				KSR1				PRKY																SNRPA1
CYP4F3	ENPP1	SBK2		SBK2	GRIA3				KSR2				PRPF4B																SNRPB
CYP4F8	EPB41	SCARA5		SCARA5	GRIA4				KYNU				PRPH																SNRPB2
CYP4V2	EPHA2	SELE		SELE	GRID1				LAMP 2				PSKH1																SNRPC
CYP4X1	EPHA5	SELL		SELL	GRID2				LAPTM5				PSKH2																SNRPD1
CYP4Z1	EPHA8	SERPINE1		SERPINE1	GRIK1				LATS1				PSMB8																SNRPD2
CYP51A1	EPHB2	SH3KBP1		SH3KBP1	GRIK2				LATS2				PSMB9																SNRPD3
CYP8B1	EPHB4	SHC1		SHC1	GRIK3				LCK				PTEN																SNTA1
CYTH4	EPO	SKIV2L2		SKIV2L2	GRIK4				LCT				PTK6																SNTB1
DAB2	EPYC	SLC29A1		SLC29A1	GRIK5				LDLR				RAB3A																SNTB2
DAPK1	ERAL1	SMAD1		SMAD1	GRIN1				LIMK1				RABAC1																SNW1
DAPK2	ERBB2	SMAD2		SMAD2	GRIN2A				LIMK2				RAF1																SOS1
DAPK3	ERBB3	SMAD3		SMAD3	GRIN2B				LMAP 1				RAGE																SOS2
DAPP1	ERCC2	SMAD4		SMAD4	GRIN2C				LMNB1				RAP1GDS1																SPOCK2
DAXX	ERCC3	SMAD5		SMAD5	GRIN2D				LMTK2				RASGRP1																SPOCK3
DAZAP1	ERCC6	SMAD6		SMAD6	GRIN3A				LMTK3				RASGRP2																SPTA1
DBP	EREG	SMAD7		SMAD7	GRP				LOC554223				RCAN1																SPTB
DCC	ERH	SMAD9		SMAD9	GSK3A				LOC651008				RCAN2																SPTBN2
DCLK2	ERN2	SMURF2		SMURF2	GSK3B				LOC652614				RGS4																SPTBN4
DCLK3	ESM1	SNRPN		SNRPN	GSN				LOC652774				RIMS1																SRGAP3
DCT	ESR1	SOCS2		SOCS2	GTF2A1				LOC653052				RIOK1																SRRM1
DDIT3	ESR2	SOCS6		SOCS6	GTF2B				LOC729020				RIOK2																SRRM2
DDR1	ETS1	SORBS1		SORBS1	GUCY2D				LOC7311292				RIOK3																SRSF1
DDR2	ETS2	SPP1		SPP1	HAND1				LOC7311751				RIPK1																SRSF10
DDX18	EXOSC10	SQSTM1		SQSTM1	HAND2				LOC731682				RIPK2																SRSF2
DDX20	EXOSC2	SRC		SRC	HAPLN3				LONP2				RIPK3																SRSF4
DEDD	EXOSC3	SRP54		SRP54	HBEGF				LRP1				RIPK4																SRSF5
DEK	EXOSC4	SST		SST	HBS1L				LRP1B				RNF19A																STK36
DERA	EXOSC5	STAB2		STAB2	HCCS				LRP6				ROCK1																SUV39H1
DHX15	EXOSC6	STAT1		STAT1	HCK				LRP8				ROCK2																SUV39H2
DIABLO	EXOSC7	STAT5A		STAT5A	HCN4				LRRK1				RPH3A																SYF2
DIMT1L	EXOSC8	STAT5B		STAT5B	HDAC1				LSM7				RPS6KA1																TCF4
DKC1	EXOSC9	STK17B		STK17B	HDAC2				LY75				RPS6KA2																TFDP1
DKK1	F10	STK24		STK24	HDAC3				LYN				RPS6KA3																TFIP11
DKK3	F11	STK3		STK3	HDAC4				MAAK				RPS6KA4																THOC3
DLG1	F12	STK33		STK33	HDAC5				MACF1				RPS6KA5																THOC4
DLG2	F13B	STK35		STK35	HDAC6				MANBA				RPS6KA6																THSD4
DLG3	F2	STK40		STK40	HDAC9				MAP1A				RPS6KB1																THUMPD2
DLG4	F2R	SUMO1		SUMO1	HIP1				MAP1B				RPS6KB2																TIMP1
DLGAP5	F7	SYT1		SYT1	HIP1R				MAP1S				RPS6KC1																TIMP2
DLX2	F8	TAOK1		TAOK1	HLA-A				MAP2				RPS6KL1																TIMP3
DLX3	F9	TAP1		TAP1	HLA-B				MAP2K1				S100B																TIMP4
DMBT1	FABP2	TBK1		TBK1	HLA-C				MAP2K2				SBK1																TLL1
DMPK	FABP6	TBP		TBP	HLA-DMA				MAP2K3				SBK2																TLL2
DNAH11	FADD	TEF		TEF	HLA-DOA				MAP2K4				SET																TNFRSF11B
DNAH17	FANCL	TEK		TEK	HLA-DOB				MAP2K5				SGK1																TNKS
DNAI1	FAS	TENC1		TENC1	HLA-DPA1				MAP2K6				SGK2																TRA2B
DNM1	FASLG	TF		TF	HLA-DPB1				MAP2K7				SGK3																TRAF6
DNM1L	FBLL1	TGFA		TGFA	HLA-DQA1				MAP3K1				SGK494																TRHDE
DNM2	FBLN1	TGFB1		TGFB1	HLA-DQA2				MAP3K10				SIK1																TRIM23
DNMT3A	FBLN2	TGFB2		TGFB2	HLA-DQB1				MAP3K11				SIK2																TRIM24
DNMT3L	FBLN5	TGFB3		TGFB3	HLA-DQB2				MAP3K12				SIK3																TRIM28
DOCK11	FBN1	THBS1		THBS1	HLA-DRA				MAP3K13				SIN3A																TRMT2A
DOCK9	FBN2	THBS2		THBS2	HLA-DRB3				MAP3K14				SLC1A3																TRPA1
DOHH	FBXL12	THPO		THPO	HLA-DRB4				MAP3K15				SLK																TRPC1
DOK2	FBXW7	THY1		THY1	HLA-E				MAP3K2				SMC3																TRPC3
DOK4	FCN2	TIE1		TIE1	HNF4A				MAP3K3				SMG1																TRPC4
DPP4	FES	TIMP1		TIMP1	HNRNPA0				MAP3K4				SNAP23																TRPC5
DPYD	FGB	TLK2		TLK2	HNRNPC				MAP3K5				SNAP25																TRPM1
DSCAML1	FGF1	TLR2		TLR2	HNRNPCL1				MAP3K6				SNRK																TRPV1
DSTYK	FGF10	TLR4		TLR4	HNRNPD				MAP3K7				SOD2																TRPV2
DTX1	FGF13	TMPRSS13		TMPRSS13	HNRNPH1				MAP3K8				SOD3																TRPV5
DUS2L	FGF14	TMPRSS2		TMPRSS2	HNRNPH3				MAP3K9				SP1																TRPV6
DUS3L	FGF18	TMPRSS3		TMPRSS3	HNRPLL				MAP4				SPEG																TXNRD1
DUSP1	FGF2	TMPRSS4		TMPRSS4	HSP90B1				MAP4K1				SPTA1																TXNRD2
DUSP10	FGF3	TMPRSS5		TMPRSS5	HSPG2				MAP4K2				SPTAN1																TXNRD3
DUSP12	FGF4	TNC		TNC	HTT				MAP4K3				SRC																TYMP
DUSP14	FGF5	TNF		TNF	ICAM1				MAP4K4				SRPK1																TYMS
DUSP16	FGF7	TNFRSF10B		TNFRSF10B	IDE				MAP4K5				SRPK2																U2AF1
DUSP18	FGF8	TNFRSF11A		TNFRSF11A	IFNG				MAPK1				SRPK3																U2AF2
DUSP19	FGF9	TNFRSF11B		TNFRSF11B	IGF1				MAPK10				STK10																UBOX5
DUSP2	FGFR1	TNFRSF14		TNFRSF14	IGF1R				MAPK11				STK11																UMPS
DUSP21	FGFR2	TNFRSF19		TNFRSF19	IGF2				MAPK12				STK16																UPB1
DUSP26	FGFR3	TNFSF10		TNFSF10	IGSF1				MAPK13				STK17A																UPF6
DUSP28	FGFR4	TNFSF11		TNFSF11	IKBKB				MAPK14				STK17B																UTRN
DUSP3	FGL2	TNFSF13B		TNFSF13B	IKBKG				MAPK15				STK24																VCAN
DUSP4	FIGF	TNFSF15		TNFSF15	IL10				MAPK3				STK25																VEGFA
DUSP5	FKBP1A	TNIK		TNIK	IL12B				MAPK4				STK3																VTN
DUSP6	FLT1	TNK1		TNK1	IL17A				MAPK6				STK31																WTAP
DUSP7	FLT3	TNN		TNN	IL1A				MAPK7				STK32A																XAB2
DUSP8	FLT3LG	TNR		TNR	IL1B				MAPK8				STK32B																XRN1
DUSP9	FLT4	TP53		TP53	IL23A				MAPK8IP1				STK32C																ZNRF1
DYNC1H1	FN1	TP53RK		TP53RK	IL4				MAPK9				STK33																ZNRF2
DYNC1I2	FNBP1	TRADD		TRADD	IL5				MAPKAPK2				STK35
DYRK1A	FNBP1L	TRPM6		TRPM6	IL6				MAPKAPK3				STK36
DYRK1B	FOS	TSC2		TSC2	IL6R				MAPKAPK5				STK38
DYRK2	FOSB	TSSK4		TSSK4	IL7				MAPRE1				STK38L
DYRK3	FOSL1	TTBK2		TTBK2	IL7R				MAPRE2				STK39
DYRK4	FRS2	TYR		TYR	ILK				MAPRE3				STK4
E2F1	FSHB	UHMK1		UHMK1	IMMT				MARK1				STK40
E2F2	FSTL1	ULK4		ULK4	INPP5D				MARK2				STX1A
E2F3	FURIN	VAV1		VAV1	INS				MARK3				STX1B
E2F6	FYN	VAV2		VAV2	INSR				MARK4				STX2
EBF1	G3BP2	VAV3		VAV3	INSRR				MAST1				STX3
EBI3	GAK	VCAN		VCAN	IPO5				MAST2				STX4
ECE1	GAS7	VIP		VIP	IQGAP1				MAST3				STXBP1
ECE2	GC	VRK1		VRK1	IQGAP2				MAST4				STXBP2
ECEL1	GDF10	VWF		VWF	IRAK1				MASTL				STXBP3
EDA	GDF11	WEE2		WEE2	IRF4				MBP				SYT1
EDA2R	GDF15	WNK1		WNK1	IRS1				MCAT				SYT2
EDAR	GDF2	WNK2		WNK2	IRS2				MCCC2				SYT5
EDN1	GDF3	XIAP		XIAP	ITGAL				MCEE				SYTL4
EDN2	GDF5	YES1		YES1	ITGAM				MELK				TAOK1
EEF2K	GDF6	ZAP70		ZAP70	ITGB2				MGC42105				TAOK2
EFTUD2	GDF9				ITGB3				MGLL				TAOK3
EGF	GFER				ITPR1				MICA				TBK1
EGFR	GFM1				ITPR3				MICB				TESK1
EGR1	GFRA1				JAK1				MINK1				TESK2
EIF2AK1	GH1				JAK2				MKNK1				TGFB2
EIF2AK2	GHRH				JAK3				MKNK2				TGFBR1
EIF2AK3	GHRL				JUN				MLPH				TGFBR2
EIF2AK4	GNA13				JUP				MMAA				TLK1
EIF3E	GNB2				KAT5				MMRN1				TLK2
EIF4EBP1	GNB3				KCNA10				MOS				TNIK
ELAC2	GNPTAB				KCNA2				MPO				TNNI3K
ELANE	GNRH1				KCNA3				MR1				TP53RK
ELF3	GPC1				KCNA5				MSN				TPI1
ELK1	GPHA2				KCNB2				MST4				TRIO
ELK4	GPI				KCNC1				MTHFD2				TRPM6
ELP2	GPN2				KCNC2				MTIF2				TRPM7
ELP3	GPN3				KCND1				MTOR				TSSK1A
ENG	GRAPL				KCNF1				MTX1				TSSK2
ENTPD1	GRB2				KCNG2				MUT				TSSK3
EP300	GRK1				KCNH1				MYL4				TSSK4
EPAS1	GRK7				KCNH2				MYLK				TSSK6
EPB41L1	GRN				KCNN4				MYLK2				TTBK1
EPHA1	GSK3A				KCNQ3				MYLK3				TTBK2
EPHA2	GSK3B				KCNS2				MYLK4				TTK
EPHA3	GTF2B				KCNV1				MYO3A				TXN
EPHA4	GTF2E1				KIAA0368				MYO3B				TXNDC2
EPHB1	GTF2E2				KIAA0430				MYO5A				UHMK1
EPHB3	GTF2F1				KIF5B				MYO6				ULK1
EPHB4	GTF2F2				KIR2DL1				MYOC				ULK2
EPHB6	GTF2H1				KIR2DL4				NAGLU				ULK3
EPO	GTF2H2				KIR3DL3				NAPA				ULK4
EPOR	GTF2H3				KIT				NCALD				UNC13B
EPRS	GTF2H4				KRAS				NCAN				UNC13C
EPS15	GTPBP1				LAIR1				NCK1				UNC13D
ERAP1	GTPBP2				LAMP2				NCK2				UQCRFS1
ERBB2	GTPBP4				LARP4B				NDE1				UQCRQ
ERBB3	GTPBP5				LARP7				NDUFS2				VAMP2
ERBB4	GZMA				LAT				NDUFS8				VCP
ERCC3	GZMK				LCAT				NEFH				VEGFA
ERF	HABP2				LCK				NEFL				VRK1
ERN1	HAND1				LCP1				NEFM				VRK2
ERN2	HAND2				LDLR				NEIL2				VRK3
ESAM	HAPLN1				LEP				NEK1				VWF
ESR1	HAPLN2				LEPREL4				NEK10				WEE1
ESR2	HAPLN3				LGALS4				NEK11				WEE2
ESRRB	HBEGF				LGMN				NEK2				WNK1
ETF1	HDGF				LIMA1				NEK3				WNK2
ETS1	HDLBP				LIMK1				NEK4				WNK3
ETS2	HES1				LIPC				NEK5				WNK4
ETV3	HEY1				LIPE				NEK6				XDH
ETV6	HGF				LMAN1				NEK7				YSK4
EVI2B	HGFAC				LOC10431				NEK8				YWHAQ
EWSR1	HHIP				LOC389031				NEK9				ZAK
EXOSC10	HIF1A				LOC402629				NES
EXT1	HIF1AN				LOC647153				NEU1
EXT2	HIPK1				LOC648695				NEUROD2
EXTL1	HIPK2				LOC652162				NLK
EXTL3	HK2				LOC652330				NLRP1
EZR	HLF				LOC652710				NLRP12
F13A1	HMCN1				LOC652826				NOD1
F2R	HMOX1				LOC729991-MEF2B				NOS1
F2RL1	HNF1B				LOC730677				NOS3
FADD	HNF4A				LPA				NPC1
FAF1	HNRNPH3				LPHN1				NRCAM
FANCD2	HNRPLL				LPL				NRK
FAS	HP				LPXN				NUAK1
FASLG	HPN				LRDD				NUAK2
FBN1	HPR				LRP1				NVL
FBXO5	HRG				LRP10				OAT
FBXW7	HSP90B1				LRP1B				OBSCN
FBXW8	HSPA5				LRP2				ODF1
FCER1G	HSPG2				LRP6				OGT
FCER2	HTRA3				LRP8				OXCT1
FCGR1A	HTRA4				LRPPRC				OXCT2
FCGR2B	HTT				LSM5				OXSM
FCGRT	HUNK				LSR				OXSR1
FDXR	ICAM1				LTBP4				PAFAH1B1
FER	ICAM2				LTK				PAK1
FES	ID3				LYN				PAK2
FGD1	IFNB1				MACF1				PAK3
FGD4	IFNG				MALT1				PAK6
FGF1	IGF1				MAN2A2				PAK7
FGF18	IGF1R				MAN2B1				PARK2
FGF2	IGF2				MAN2B2				PARK7
FGF3	IGF2R				MAP1S				PASK
FGF6	IGFALS				MAP2				PBK
FGFR1	IGFBP1				MAP2K1				PC
FGFR2	IGFBP2				MAP2K3				PCCA
FGFR3	IGFBP3				MAP2K4				PCCB
FGFR4	IGFBP4				MAP2K6				PCK1
FGR	IGFBP5				MAP3K1				PCLO
FHL2	IGFBP6				MAP3K11				PCNA
FIGF	IGFBPL1				MAP3K4				PDGFB
FIGLA	IHH				MAPK1				PDHX
FLI1	IKBKAP				MAPK3				PDIK1L
FLJ45422	IKBKB				MAPK7				PDPK1
FLJ46361	IL10				MAPKAPK5				PDPK2
FLT1	IL11				MAPT				PEX1
FLT3	IL12B				MARCKS				PEX6
FLT3LG	IL13				MATK				PHF1
FLT4	IL15				MBNL1				PHKG1
FN1	IL16				MBP				PHKG2
FOS	IL17A				MBTPS1				PICALM
FOSB	IL17F				MCAM				PIK3C2A
FOSL1	IL18				MCM2				PIK3R4
FOSL2	IL18BP				MCM3				PIM1
FOXK2	IL1A				MCM4				PIM2
FOXM1	IL1B				MCM6				PIM3
FRK	IL1R1				MCM7				PIN1
FRMD5	IL1R2				MDM2				PINK1
FRS2	IL1RAP				MED1				PKLR
FRS3	IL1RAPL2				MED12				PKMYT1
FURIN	IL1RL1				MEF2A				PKN1
FYB	IL1RL2				MEF2D				PKN2
FYN	IL2				MERTK				PKN3
GAB1	IL24				MET				PLCB2
GAB2	IL26				METAP2				PLCG1
GAK	IL2RA				MGAT1				PLCG2
GAR1	IL2RG				MGAT2				PLK1
GARS	IL32				MGAT3				PLK2
GAS6	IL4				MGAT5				PLK3
GATA1	IL5				MICA				PLK4
GATA2	IL6				MIF				PLK5P
GATA3	IL6R				MKNK1				PNCK
GBF1	IL7				MLL				POLB
GCM1	IL8				MLLT10				PORCN
GCNT2	ILK				MLLT4				PPAT
GDE1	IMMP2L				MMP2				PPP2CA
GFAP	IMPG2				MMP9				PPP2R4
GFI1	INHA				MPL				PPP5C
GHR	INHBA				MPP5				PRF1
GHRH	INHBB				MRAS				PRKAA1
GIMAP4	INHBC				MRPL12				PRKAA2
GIMAP5	INHBE				MRPS12				PRKACA
GIPC1	INS				MRPS16				PRKACB
GIT1	INSR				MRTO4				PRKACG
GJA1	INTS1				MS4A1				PRKCA
GMFB	INTS10				MS4A6E				PRKCB
GNAO1	INTS12				MSN				PRKCD
GNAZ	INTS2				MSR1				PRKCE
GNRH1	INTS3				MSX1				PRKCG
GORASP2	INTS4				MTHFR				PRKCH
GPI	INTS5				MTMR1				PRKCI
GPR109A	INTS6				MTOR				PRKCQ
GPR120	INTS7				MTRK3				PRKCZ
GPR132	INTS8				MTTP				PRKD1
GPR44	INTS9				MUSK				PRKD2
GRB14	IRAK1				MYBPC1				PRKD3
GRB2	IRS1				MYBPC2				PRKDC
GRB7	IRS2				MYBPC3				PRKG1
GRIN1	ITGA1				MYC				PRKG2
GRK1	ITGA2B				MYCL1				PRKX
GRK4	ITGA5				MYD88				PRKY
GRK5	ITGA9				MYF5				PRNP
GRK6	ITGAM				MYF6				PRPF4B
GRK7	ITGAV				MYH1				PSAP
GSC	ITGB1				MYH10				PSEN1
GSG2	ITGB2				MYH11				PSEN2
GSK3A	ITGB3				MYH13				PSKH1
GSK3B	ITK				MYH14				PSKH2
GTF2E2	ITLN1				MYH15				PSMC2
GTF2F1	JAG1				MYH2				PSMC3
GTF2I	JAG2				MYH3				PTEN
GTF3C1	JAK2				MYH4				PTK2
GUCY2D	JAK3				MYH6				PTK2B
GUCY2F	JUN				MYH7				PTK6
HAND1	JUNB				MYH7B				PTPN11
HAND2	JUND				MYH8				PTPN6
HAVCR1	KATNB1				MYH9				PTPN9
HAVCR2	KAZALD1				MYL1				PTPRC
HBB	KCNN4				MYL12A				PTPRK
HBS1L	KCNT1				MYL2				RAB35
HCK	KCNU1				MYL3				RAET1E
HDAC1	KDR				MYL4				RAET1G
HDAC11	KHDRBS1				MYL5				RAET1L
HDAC2	KIT				MYL6				RAF1
HDAC3	KITLG				MYL6B				RAGE
HDAC6	KL				MYL7				RASA1
HES1	KLHL1				MYL9				RASGRP1
HES4	KLHL35				MYLPF				RB1
HES5	KLK10				MYO10				RELM
HES6	KLK11				MYO15A				RELT
HESX1	KLK12				MYO18A				REXO2
HEXA	KLK13				MYO18B				RHOA
HEXB	KLK14				MYO19				RIOK1
HEY1	KLK15				MYO1A				RIOK2
HEY2	KLK3				MYO1B				RIOK3
HEYL	KLK4				MYO1C				RIPK1
HFE	KLK5				MYO1D				RIPK2
HGF	KLK6				MYO1E				RIPK3
HHIPL1	KLK7				MYO1F				RIPK4
HIF1A	KLK9				MYO1G				RNASE2
HIPK1	KLKB1				MYO1H				ROCK1
HIPK2	KSR1				MYO3A				ROCK2
HIPK3	LACE1				MYO3B				RPH3A
HIPK4	LAMA1				MYO5A				RPS6KA1
HLA-C	LAMA2				MYO5B				RPS6KA2
HLA-DMA	LAMA3				MYO5C				RPS6KA2
HLA-DMB	LAMA4				MYO6				RPS6KA3
HLA-DOA	LAMA5				MYO7A				RPS6KA5
HLA-DOB	LAMB1				MYO9A				RPS6KA6
HLA-DPA1	LAMB2				MYO9B				RPS6KB2
HLA-DPB1	LAMB3				MYOC				RPS6KC1
HLA-DPB2	LAMB4				MYOD1				RPS6KKB1
HLA-DQB2	LAMC1				MYOG				RPS6KL1
HLA-DRB2	LAMC2				N4BP2				S100B
HLA-DRB3	LAMC3				NAT10				SBK1
HLA-DRB4	LBP				NCAN				SBK2
HLA-DRB5	LCAT				NCK1				SCARB1
HLA-DRB6	LCK				NCK2				SDHA
HLA-F	LDLR				NCL				SDS
HLA-G	LECT1				NCOA1				SFTPD
HLA-H	LEFTY1				NCOA2				SGK1
HLF	LEFTY2				NCOA3				SGK2
HLX	LEP				NCOR1				SGK3
HMGB2	LFNG				NCOR2				SGK494
HNF1A	LHB				NCR1				SHC1
HNRNPF	LIF				NEB				SIAE
HNRNPK	LIMK2				NEBL				SIGLEC6
HNRNPU	LIPE				NEDD1				SIK1
HOMER1	LIPF				NEDD9				SIK2
HOMER2	LIPG				NEFM				SIK3
HOXD8	LMTK2				NFKB1				SLA2
HOXD9	LMTK3				NFKB2				SLC12A2
HPN	LOC441584				NFKBIA				SLC12A3
HRAS	LOC651008				NFKBIB				SLC12A4
HSP90AB1	LOC651308				NFKBIE				SLC12A5
HSP90B1	LOC651313				NGEF				SLC12A6
HSPA4	LOC651610				NGF				SLC6A1
HSPA5	LOC729619				NHP2				SLK
HSPB1	LOX				NHP2L1				SLS12A1
HTATIP2	LPA				NKX2-5				SMG1
HTR1A	LPL				NLRC4				SMPD1
HUNK	LRP1				NME1				SNAP91
HYOU1	LRPAP1				NME1-NME2				SNCAIP
ICAM1	LRRK2				NME3				SNCB
ICAM2	LSM1				NME6				SNRK
ICAM3	LSM2				NOD1				SOD1
ICK	LTA				NOD2				SPAST
ICOS	LTBP2				NOS2				SPATA5
ICOSLG	LTBP4				NPAS3				SPATA5L1
ID2	LTK				NPHP1				SPEG
IDO1	LUM				NPHS2				SPG7
IER3	LYVE1				NPPA				SPHK1
IFI35	M6PR				NPR1				SPTB
IFNA10	MAF				NPY6R				SRC
IFNA13	MAFB				NR1H3				SRPK1
IFNA14	MAFF				NRAS				SRPK2
IFNA16	MAFG				NRG1				SRPK3
IFNA17	MAK				NRP2				STAR
IFNA2	MAML1				NUCB1				STAU1
IFNA21	MAML3				NUFIP2				STK10
IFNA4	MAP2K1				NXF1				STK11
IFNA5	MAP2K3				OBSCN				STK16
IFNA6	MAP2K4				OLR1				STK17A
IFNA7	MAP2K6				OPHN1				STK17B
IFNA8	MAP4K3				OXN				STK24
IFNAR1	MAPK1				PACSIN3				STK25
IFNAR2	MAPK12				PAIP1				STK3
IFNB1	MAPK3				PAK1				STK31
IFNE	MAPKAPK3				PAK6				STK32A
IFNG	MAPKAPK5				PAPLN				STK32B
IFNGR1	MASP1				PARN				STK32C
IFNGR2	MASP2				PATZ1				STK33
IFNK	MASTL				PCBP2				STK35
IFNW1	MATK				PCNA				STK36
IGF1	MBTPS1				PDCD5				STK38
IGF1R	MBTPS2				PDCD6IP				STK38L
IGF2	MCL1				PDE10A				STK4
IGF2R	MDK				PDE11A				STK40
IGHM	MECP2				PDE1A				STUB1
IGSF6	MED20				PDE1B				STX1A
IKBKB	MED21				PDE1C				STXBP1
IKBKE	MED7				PDE2A				SUCLG2
IKBKG	MELK				PDE3A				SYK
IL10	MEN1				PDE3B				SYN1
IL10RA	MEP1B				PDE4A				SYNJ1
IL10RB	MERTK				PDE4B				SYT1
IL11	MET				PDE4C				SYT10
IL11RA	METAP1				PDE4D				SYT12
IL12A	METAP1D				PDE5A				SYT17
IL12RB1	MFAP4				PDE6A				SYT2
IL12RB2	MFNG				PDE6B				SYT3
IL13	MGLL				PDE6C				SYT4
IL13RA1	MGP				PDE7A				SYT5
IL13RA2	MIF				PDE8A				SYT6
IL15	MKNK1				PDE8B				SYT7
IL15RA	MLRP1				PDE9A				SYT9
IL16	MLRP12				PDGFRA				SYTL1
IL17A	MMP1				PDGFRB				SYTL2
IL17F	MMP10				PDIA3				SYTL4
IL17RA	MMP11				PDLIM5				TAOK1
IL18	MMP12				PDPK1				TAOK2
IL18BP	MMP13				PEPD				TAOK3
IL18R1	MMP14				PEX13				TARDBP
IL19	MMP16				PF4				TBK1
IL1A	MMP17				PICK1				TENC1
IL1B	MMP19				PIK3R1				TESK1
IL1R1	MMP2				PIR				TESK2
IL1R2	MMP23B				PITPNM1				TGFB1
IL1RAP	MMP26				PITPNM2				TGFBR1
IL1RAPL2	MMP28				PITPNM3				TGFBR2
IL1RL2	MMP3				PKD2				TH
IL1RN	MMP7				PKN2				THBS3
IL2	MMP8				PKNOX2				THY1
IL20	MMP9				PKP1				TLK1
IL20RA	MMRN2				PKP2				TLK2
IL21	MOS				PKP3				TLN
IL21R	MPDZ				PKP4				TLN2
IL22	MRPL13				PLA2G7				TNF
IL22RA1	MRPS11				PLAG1				TNIK
IL23A	MRPS12				PLAGL1				TNNI2K
IL23R	MRPS7				PLAGL2				TNS1
IL24	MSH2				PLAU				TNS3
IL27	MSR1				PLCG1				TNS4
IL27RA	MST1				PLCG2				TP53RK
IL28RA	MTG1				PLD1				TRA@
IL2RB	MTOR				PLG				TRAF6
IL2RG	MUC2				PLK1				TRIO
IL3	MUC5AC				PLS1				TRPM6
IL3RA	MUSK				PLS3				TRPM7
IL4	MVD				PLTP				TSSK1A
IL4R	MYB				PMCH				TSSK2
IL5	MYC				POLR1A				TSSK3
IL5RA	MYD88				POLR1B				TSSK4
IL6	MYLK4				POLR2E				TSSK6
IL6R	MYO18A				POLR2I				TTBK
IL6ST	MYO1E				POLR2L				TTBK2
IL7	MYO1F				POLR3A				TTK
IL8	MYO3A				POLR3H				TTN
IL9	NAT8				POMC				TUBA4A
IL9R	NCAN				PON1				TUBB
ILK	NCK1				PON2				TUBB2A
IMP4	NCK2				PON3				TUBB2B
INCENP	NCL				PPARD				TUBB3
INPP5A	NCOA2				PPP6C				TUBB4
INPP5K	NCOR1				PRKCA				TUBGCP5
INS	NCOR2				PRKCB				TUBGCP6
INSR	NCSTN				PRKCD				UBE2L3
INSRR	NDP				PRKCE				UBQLN1
IQGAP1	NEIL1				PRKCSH				UCHL1
IQSEC2	NEK1				PRL				UGCG
IRAK1	NEK6				PRNP				UHMK1
IRAK2	NEK8				PRODH2				ULBP1
IRAK3	NELF				PSAP				ULBP2
IRAK4	NES				PSEN1				ULBP3
IRF1	NFATC1				PSIP1				ULK1
IRF2	NFATC2				PSMA2				ULK2
IRF3	NFATC3				PSMA3				ULK3
IRF4	NFATC4				PSMA4				ULK4
IRF5	NFE2L3				PSMA5				UMOD
IRF6	NFKBIA				PSMA6				USHBP 1
IRF7	NFX1				PSMA7				USO1
IRF9	NFYA				PSMA8				UXT
IRS1	NFYC				PSMB1				VAMP2
IRS2	NGF				PSMB10				VAMP3
IRS4	NGFR				PSMB11				VAPA
ISG15	NHP2L1				PSMB2				VAV1
ISL1	NID1				PSMB3				VAV2
ISL2	NID2				PSMB4				VAV3
ITGA2B	NKX2-5				PSMB5				VCP
ITGA3	NOD1				PSMB6				VIM
ITGA4	NODAL				PSMB7				VLDLR
ITGA5	NONO				PSMB8				VPS4A
ITGA9	NOS2				PSMB9				VPS4B
ITGAD	NOS3				PSMC1				VRK1
ITGAE	NOTCH1				PSMC2				VRK2
ITGAL	NOTCH2				PSMC3				VRK3
ITGAM	NOTCH3				PSMC4				WEE1
ITGAX	NOV				PSMC5				WEE2
ITGB1	NPPA				PSMC6				WIPF1
ITGB2	NPPC				PSMD1				WNK1
ITGB3	NPTX1				PSMD10				WNK2
ITGB6	NPTX2				PSMD11				WNK3
ITGB7	NPY				PSMD12				WNK4
ITK	NR1H4				PSMD13				WNT3
JAG1	NR5A2				PSMD14				WNT9B
JAK1	NRG1				PSMD2				YME1L1
JAK2	NRP1				PSMD3				YSK4
JAK3	NRP2				PSMD4				YWHAB
JAM2	NRTN				PSMD5				YWHAZ
JAM3	NTIF2				PSMD6				ZAK
JDP2	NTN1				PSMD7
JUN	NTN3				PSMD8
JUNB	NTN4				PSMD9
JUND	NTRA2				PSME1
JUP	NTRK1				PSME2
KALRN	NTRK2				PSME3
KAT2A	NTRK3				PSTPIP1
KAT5	NUAK2				PTGS1
KDR	NUBPL				PTK2
KDSR	NUDT6				PTN
KEL	NUMB				PTPN11
KHDRBS1	NUMBL				PTPN12
KIAA1967	NXF1				PTPN14
KIF11	OBSCN				PTPN6
KIF12	OCLN				PTPRC
KIF13A	ODZ1				PTPRD
KIF13B	OGN				PTPRG
KIF14	OSGEP				PTPRK
KIF16B	OSM				PTPRO
KIF18B	OVOS				PTPRS
KIF19	OXSM				PTPRU
KIF1C	OXSR1				PUF60
KIF20A	PAICS				PVRL1
KIF23	PAIP2				PVRL3
KIF24	PAK1				PVRL4
KIF25	PAK4				PYCARD
KIF26B	PAK6				PYDC1
KIF2B	PAPLN				RAB13
KIF3A	PAPOLA				RAB1A
KIF3B	PAPPA				RAB1B
KIF3C	PARD6A				RAB3A
KIF4A	PARD6B				RAB3B
KIF4B	PASK				RAB3C
KIF5A	PBK				RAB3D
KIF5B	PCBP2				RAB41
KIF5C	PCF11				RAB4A
KIR2DL1	PCNA				RAB5A
KIR2DL4	PCSK5				RAB5B
KIR2DS2	PCSK7				RAB5C
KIR2DS5	PDGFA				RAB6A
KIR3DL1	PDGFB				RAB6B
KIR3DL2	PDGFC				RAB6C
KIR3DS1	PDGFD				RAB8A
KIT	PDGFRA				RAB8B
KITLG	PDGFRB				RAB9B
KLC3	PDPK1				RAC2
KLRC1	PECAM1				RAD51
KLRC2	PEX13				RAD51C
KLRC3	PF4				RAF1
KLRD1	PGCP				RALA
KPNA2	PGF				RALGDS
KPNB1	PGK1				RALY
KRAS	PHKG1				RAN
KRR1	PHKG2				RAP1A
KSR1	PHOX2A				RAP1B
KSR2	PI3				RAP2A
LAG3	PIAS1				RAP2B
LAMP3	PIAS2				RAP2C
LAPTM5	PIK3CG				RAPGEF1
LARS2	PKD1				RAPGEF2
LATS1	PKDCC				RAPGEF3
LATS2	PKN3				RASA1
LBP	PLA1A				RASGRP1
LCK	PLA2G7				RASGRP2
LCP1	PLAT				RASIP1
LCP2	PLAU				RB1CC1
LDLR	PLEK				RBBP7
LDLRAP1	PLEKHA8				RBM18
LEP	PLEKHB1				RBM28
LEPR	PLG				RBM39
LGALS3BP	PLK4				RBM4B
LHX1	PLTP				RBM5
LIF	PLUNC				RBM8A
LIFR	PMCH				RBMXL2
LILRA1	PML				RCN2
LILRB1	PNCK				RDX
LILRB2	PNLIP				REL
LILRB4	PNLIPRP1				RELA
LIMK1	PNLIPRP2				RELB
LIMK2	PNLIPRP3				RELN
LIPE	POFUT1				REN
LMTK2	POLE				RFC1
LMTK3	POLR1A				RFC2
LNPEP	POLR1B				RFC3
LOC10431	POLR1C				RFC4
LOC388642	POLR1C				RGL2
LOC391771	POLR1D				RGL3
LOC392395	POLR2A				RGS12
LOC407835	POLR2C				RHEB
LOC441868	POLR2D				RHEBL1
LOC554223	POLR2E				RHOA
LOC619207	POLR2F				RIN1
LOC645106	POLR2G				RIN2
LOC646981	POLR2H				RIPK1
LOC649853	POLR2I				RIPK2
LOC651008	POLR2J				ROCK1
LOC651581	POLR2J2				ROCK2
LOC652614	POLR2J3				ROS1
LOC652774	POLR2J4				RPL10L
LOC652834	POLR2K				RPL15
LOC653052	POLR2L				RPL15P11
LOC728683	POLR3A				RPL19
LOC730410	POLR3B				RPL3
LOC730415	POLR3C				RPL4
LOC731682	POLR3D				RPL5
LOC731751	POLR3F				RPL5P1
LOC731933	POLR3G				RPL8
LOC731938	POLR3H				RPLP0
LOC731940	POLR3K				RPLP1
LOXL3	POMC				RPS13
LOXL4	POSTN				RPS13P8
LRP1	POU2F1				RPS19
LRPAP1	PPAP2B				RPS23
LRPPRC	PPP6C				RPS24
LRRK1	PPY				RPS29
LRRK2	PRKCA				RPS3A
LTA	PRKCE				RPS3AP6
LTA4H	PRKCI				RPS4Y1
LTB	PRKD1				RPS6
LTBP4	PRKD2				RPS6KA1
LTBR	PRKD3				RPS8
LTK	PRKG1				RRAS
LY75	PRKG2				RTN4R
LY9	PRKX				RUNX1
LYN	PRL				RUVBL2
MA	PRLHR				RYK
MADCAM1	PRLR				RYR1
MADD	PRMT5				RYR3
MAFA	PROC				S100A8
MAFB	PROK1				SAA1
MAFF	PROK2				SAP18
MAFG	PROM1				SART3
MAFK	PROX1				SBDS
MAK	PROZ				SCARB1
MAP2	PRPF4				SCG2
MAP2K1	PRPF4B				SDC2
MAP2K2	PRPF8				SDCCAG1
MAP2K3	PRSS1				SEC61A1
MAP2K4	PRSS2				SEC61A2
MAP2K5	PRSS3				SELE
MAP2K6	PRSS36				SERPINC1
MAP2K7	PRSS8				SERPINE1
MAP3K1	PSEN1				SERPINH1
MAP3K12	PSEN2				SETD1A
MAP3K13	PSKH2				SFPQ
MAP3K14	PSMA4				SGK223
MAP3K2	PSMA7				SH2B3
MAP3K3	PSMB5				SH2D3C
MAP3K4	PSMB8				SH3GL1
MAP3K7	PTGS1				SH3GL2
MAP3K8	PTGS2				SH3GL3
MAP3K9	PTH				SH3GLB1
MAP4K1	PTHLH				SH3KBP1
MAP4K2	PTK2				SH3RF1
MAP4K3	PTK2B				SH3YL1
MAP4K4	PTN				SHC1
MAP4K5	PTPN13				SHROOM1
MAPK10	PTPN6				SHROOM2
MAPK11	PTRH1				SIGLEC6
MAPK12	PTTG1				SIK1
MAPK13	PTX3				SIN3A
MAPK14	PUF60				SIN3B
MAPK15	PZP				SLC1A3
MAPK3	RAB13				SLC24A2
MAPK4	RAB25				SLC24A6
MAPK6	RAB33B				SLC2A1
MAPK7	RAB34				SLC5A12
MAPK8	RAB38				SLC8A1
MAPK8IP2	RAB3B				SLIT2
MAPK9	RAB6B				SMAD1
MAPKAPK2	RAC1				SMAD2
MAPKAPK3	RAD1C				SMAD3
MAPKAPK5	RAD51				SMAD4
MAPKSP1	RAD51L3				SMAD5
MAPT	RAF1				SMURF2
MARCKS	RAGE				SNAP91
MARCO	RAN				SNRPD3
MARK1	RAP2A				SNRPE
MARK2	RASD2				SNRPF
MARK3	RASL12				SNRPG
MARK4	RBBP5				SNX4
MAST1	RBM28				SOD3
MAST2	RBM5				SORBS1
MAST3	RBM8A				SORBS2
MAST4	RBPJ				SORBS3
MASTL	RBPJL				SORL1
MATK	RCOR1				SORT1
MATN1	RELN				SOS1
MAX	REN				SOS2
MAZ	RET				SP1
MBL2	RFNG				SPON2
MBP	RGS19				SPP1
MCAM	RHEBL1				SPTA1
MCF2	RHOA				SPTB
MCF2L	RHOD				SPTBN2
MCF2L2	RHOG				SRC
MCL1	RHOH				SRF
MCM7	RHOJ				SRPK1
MDGA1	RIPK1				SRSF10
MDGA2	RIPK4				SRSF4
MDK	RNF130				SRSF5
MDM2	RNF14				SST
MEF2D	RNF146				ST6GAL2
MELK	RNF5				STAM
MEP1B	RNPS1				STAM2
MET	ROBO1				STAP1
METAP2	ROCK1				STAT1
MFN1	ROCK2				STAT3
MFN2	ROS1				STOM
MGC42105	RPA2				STON1-GTF2A1L
MIB1	RPAP1				STON2
MICA	RPIA				SUDS3
MICB	RPL23				SUFU
MIF	RPS16				SVIL
MINA	RPS23				SYK
MINK1	RPS5				SYN2
MITF	RPS6KB2				SYNE1
MKKS	RPS6KC1				SYNE2
MKNK1	RTP1				SYNJ1
MKNK2	RUNX2				SYNJ2
MLH1	RYK				SYNPO
MLXIPL	S1PR1				SYT1
MMAA	SARS				SYT5
MME	SART3				TARDBP
MMP10	SBDS				TBP
MMP2	SBK2				TBPL1
MMP23B	SCAP				TBPL2
MMP3	SCARA3				TBX20
MMP9	SCARA5				TCF12
MOAP1	SCGB1A1				TCF3
MOG	SCUBE1				TCF4
MOS	SCUBE3				TCP1
MPL	SELE				TEAD1
MR1	SELL				TF
MRI1	SEMA3A				TGFA
MRTO4	SEMA3F				TGFB1
MS4A1	SEMA4A				TGFB1I1
MSH2	SERPINE1				TGFB2
MSN	SERPING1				TGFBR2
MSR1	SETD1A				TGM2
MSRA	SF3A1				TGM4
MST1R	SF3B4				TGM5
MST4	SFPQ				THBS2
MTOR	SFTPC				TIA1
MTRR	SGK196				TIAL1
MTX2	SGK223				TIAM1
MUSK	SH3KBP1				TIMM10
MXD1	SH3YL1				TIMM17A
MXI1	SHB				TIMM17B
MYB	SHBG				TIMM22
MYBL2	SHC1				TIMM44
MYCBP	SHH				TIMM50
MYCBP2	SIK1				TJP1
MYCL1	SIM1				TLN1
MYCN	SIN3A				TLN2
MYD88	SKAP2				TLR2
MYLK	SKIV2L2				TLR6
MYLK2	SLC10A1				TLX3
MYLK3	SLC10A2				TMEM25
MYLK4	SLC16A1				TNF
MYO10	SLC16A2				TNFRSF11A
MYO3A	SLC16A3				TNFRSF11B
MYO3B	SLC16A4				TNFRSF1A
MYO6	SLC16A5				TNFRSF1B
MYOC	SLC16A6				TNFRSF21
MYOD1	SLC16A7				TNFSF10
N6AMT1	SLC29A1				TNK1
NANOG	SLC2A1				TOMM20
NCK1	SLC2A2				TOMM20L
NCL	SLCO1A2				TOMM22
NCOA1	SLCO2A1				TOMM40L
NCOR2	SLURP1				TOMM7
NCR1	SMAD1				TOMM70A
NCR2	SMAD2				TP53
NDUFA13	SMAD3				TP53BP2
NEDD9	SMAD4				TP53RK
NEFH	SMAD5				TP63
NEFM	SMAD6				TPM1
NEK1	SMAD7				TRADD
NEK10	SMAD8				TRAF1
NEK11	SMAD9				TREM1
NEK2	SMARCC2				TREML1
NEK3	SMOC2				TREML2
NEK4	SMURF1				TRIP10
NEK5	SMURF2				TRMT1
NEK6	SNRPN				TRPC3
NEK7	SNTG1				TRPC5
NEK8	SOCS2				TRPM7
NEK9	SOCS6				TRPV2
NEUROD2	SOD1				TRPV4
NEUROD6	SORBS1				TTBK2
NEUROG1	SORBS2				TTR
NEXN	SORBS3				TYK2
NF2	SP1				TYROBP
NFATC1	SP3				U2AF1
NFATC2	SPARC				U2AF1L4
NFE2	SPARCL1				UBE3A
NFE2L1	SPINK5				UCN2
NFE2L2	SPOCK1				USP14
NFE2L3	SPON1				UTRN
NFIA	SPP1				UTS2
NFIL3	SQSTM1				UTS2R
NFKB1	SRC				VASP
NFKB2	SRGN				VAV1
NFKBIA	SRP54				VAV2
NFKBIB	SRSF10				VAV3
NFKBIE	SSPO				VCAM1
NFX1	SST				VCL
NFYB	SSU72				VDAC1
NFYC	ST14				VDAC1P4
NGF	STAB2				VDAC2
NGFR	STAM				VDAC3
NIP7	STAM2				VEGFA
NKG7	STAT1				VGLL2
NKIRAS2	STAT3				VLDLR
NKX2-1	STAT5A				VTN
NKX2-2	STAT5B				WAS
NKX2-5	STC1				WASL
NLK	STK17B				WEE2
NLRP1	STK24				WIF1
NLRP12	STK3				WTIP
NMD3	STK33				WWP2
NME2	STK35				XPO1
NMI	STK40				XRCC6
NOD1	STMN2				YES1
NOD2	STRAP				YY1
NODAL	STUB1				ZAP70
NOP56	STX8				ZBTB32
NOS2	STYXL1				ZBTB7B
NOTCH1	SUCLG1				ZCRB1
NOTCH2	SUMO1				ZFYVE1
NOTCH4	SUPT5H				ZNF202
NPAS1	SYT1				ZNF281
NPAS2	TAC1				ZNF345
NPAS4	TAC3				ZNF408
NPHP1	TAF13				ZNF621
NPHP3	TAF5				ZNF652
NPR1	TAF6
NR0B2	TAOK1
NR2F1	TAP1
NR3C1	TARDBP
NR4A1	TBK1
NR5A1	TBP
NRAS	TBPL1
NRCAM	TBPL2
NRG1	TBX1
NRK	TCEA1
NRL	TCEA2
NSMAF	TCEA3
NSUN2	TCEB1
NT5E	TDGF1
NTAN1	TEF
NTN1	TEK
NTRK1	TENC1
NTRK2	TF
NTRK3	TFAP2A
NUAK1	TFAP2B
NUAK2	TFAP2C
OAS1	TGFA
OAS3	TGFB1
OBSCN	TGFB2
OGT	TGFB3
OLIG1	TGFBR2
OLR1	TGFBR3
OPCML	TGFBRAP1
OSBP	TH1L
OSBP2	THBS1
OSBPL3	THBS2
OSBPL6	THBS3
OSM	THBS4
OSMR	THPO
OXSR1	THY1
P4HB	TIE1
PAK1	TIMP1
PAK2	TIMP2
PAK3	TIMP3
PAK4	TIMP4
PAK6	TJP1
PAK7	TLK2
PARP1	TLR2
PARP10	TLR4
PARS2	TMEM8B
PASK	TMPRSS11D
PATZ1	TMPRSS13
PAX3	TMPRSS2
PAX6	TMPRSS3
PAX8	TMPRSS4
PBK	TMPRSS5
PCGF2	TMPRSS6
PCNA	TMPRSS9
PDC	TNC
PDCD1	TNF
PDCD1LG2	TNFRSF10B
PDGFA	TNFRSF10D
PDGFB	TNFRSF11A
PDGFRA	TNFRSF11B
PDGFRB	TNFRSF14
PDIA3	TNFRSF19
PDIK1L	TNFRSF4
PDPK1	TNFSF10
PDPK2	TNFSF11
PDX1	TNFSF13B
PDZK1	TNFSF15
PEA15	TNIK
PECAM1	TNK1
PFDN5	TNN
PFKM	TNNT1
PGF	TNR
PGK1	TP53
PGM2	TP53RK
PGM2L1	TPSAB1
PHEX	TPSB2
PHF12	TRADD
PHKG1	TRIP10
PHKG2	TRPM6
PHLDA1	TSC2
PHLDA3	TSHB
PI4KA	TSSK4
PIAS1	TTBK2
PIAS2	TTPAL
PIAS3	TTR
PIAS4	TYMP
PIK3CA	TYMS
PIK3CG	TYR
PIK3R1	TYRP1
PIK3R2	U2AF1
PIK3R3	U2AF1L4
PIK3R4	U2AF2
PIM1	UBA52
PIM2	UBD
PIM3	UBE2E3
PINK1	UBE2Z
PIP4K2B	UBXN1
PITX2	UHMK1
PKMYT1	ULK4
PKN1	USH2A
PKN2	VAMP8
PKN3	VAP8
PLAT	VASP
PLAU	VAV1
PLAUR	VAV2
PLCB1	VAV3
PLCB2	VCAM1
PLCB4	VCAN
PLCD1	VEGFB
PLCD3	VEGFC
PLCG1	VHL
PLCG2	VIP
PLD1	VPS24
PLEKHA4	VRK1
PLEKHG3	VSIG4
PLEKHG6	VTN
PLEKHG7	VWF
PLK1	WDR13
PLK2	WDR33
PLK3	WDR61
PLK4	WEE2
PLK5P	WFDC1
PLS3	WFIKKN1
PMCH	WHSC2
PML	WISP1
PNCK	WISP2
PNP	WISP3
POLG	WNK1
POLR1C	WNK2
POLR2A	WNT1
POMC	WNT10B
POR	WNT4
POU2AF1	WRNIP1
POU3F2	WT1
PPARA	WWOX
PPARG	XBP1
PPBP	XIAP
PPP2CA	XRCC2
PRDM1	XRCC3
PRF1	XRN1
PRIM1	XRN2
PRKAA1	YARS
PRKAA2	YES1
PRKACA	ZAK
PRKACB	ZAP70
PRKACG	ZFYVE9
PRKCA	ZNF24
PRKCB	ZNF263
PRKCD	ZNF274
PRKCE	ZNF396
PRKCG
PRKCH
PRKCI
PRKCQ
PRKCZ
PRKD1
PRKD2
PRKD3
PRKDC
PRKG1
PRKG2
PRKX
PRKY
PRL
PRLR
PROX1
PRPF4B
PRSS12
PSD2
PSKH1
PSKH2
PSMB8
PSMB9
PSMC3
PSMD2
PTEN
PTF1A
PTGER2
PTGER3
PTGFR
PTGFRN
PTGIR
PTGS2
PTH
PTK2
PTK2B
PTK6
PTK7
PTN
PTP4A1
PTP4A2
PTP4A3
PTPN1
PTPN11
PTPN12
PTPN13
PTPN14
PTPN18
PTPN2
PTPN20A
PTPN21
PTPN22
PTPN23
PTPN3
PTPN4
PTPN5
PTPN6
PTPN7
PTPN9
PTPRA
PTPRB
PTPRC
PTPRD
PTPRE
PTPRF
PTPRG
PTPRH
PTPRJ
PTPRM
PTPRN
PTPRN2
PTPRO
PTPRQ
PTPRR
PTPRS
PTPRT
PTPRU
PTPRZ1
PTTG1
PUS7
PVRL2
PXN
RABGAP1
RABL3
RAC1
RAET1E
RAET1G
RAET1L
RAF1
RAG1
RAG2
RAGE
RALBP1
RALGDS
RAP1B
RASA1
RASA2
RASA3
RASAL2
RASAL3
RASL11B
RB1
RBL1
RBL2
RBM45
RBPJ
RDX
REL
RELA
RELB
RELN
RET
RFC3
RFX1
RGL3
RGS12
RGS14
RGS16
RGS19
RGS2
RGS7
RGS9
RHOT2
RIMBP2
RIOK1
RIOK2
RIOK3
RIPK1
RIPK2
RIPK3
RIPK4
RNASE2
RNASE6
RNF11
RNF123
RNF128
RNF144B
RNF41
RNGTT
ROBO1
ROBO2
ROCK1
ROCK2
ROR1
ROR2
ROS1
RPA2
RPE65
RPS6KA1
RPS6KA2
RPS6KA3
RPS6KA4
RPS6KA5
RPS6KA6
RPS6KB1
RPS6KB2
RPS6KC1
RPS6KL1
RTEL1
RUNX1
RUNX1T1
RUNX2
RUNX3
RUVBL1
RUVBL2
RYK
S100A10
S100A7
S100A8
S100A9
SAG
SATB2
SBK1
SBK2
SCARA5
SCO1
SCRT1
SCYL2
SDCBP
SDHB
SELE
SELL
SELP
SEMA3C
SERPINE1
SF3B3
SGK1
SGK2
SGK3
SGK494
SH2B2
SH2B3
SH3BP2
SH3GLB1
SH3KBP1
SHC1
SHC2
SHC3
SHC4
SIK1
SIK2
SIK3
SILV
SIM2
SIRPA
SIRT2
SIVA1
SIX1
SKI
SKIV2L2
SKP1
SKP2
SLA2
SLAMF1
SLAMF8
SLC11A1
SLC13A1
SLC13A2
SLC13A3
SLC13A4
SLC15A1
SLC15A3
SLC15A4
SLC1A3
SLC25A22
SLC26A1
SLC26A10
SLC26A11
SLC26A2
SLC26A4
SLC26A5
SLC26A6
SLC26A7
SLC26A8
SLC26A9
SLC28A1
SLC28A2
SLC28A3
SLC29A1
SLC30A1
SLC30A10
SLC30A2
SLC30A3
SLC30A4
SLC30A5
SLC30A8
SLC3A2
SLC4A1
SLC4A2
SLC4A3
SLC4A4
SLC4A9
SLC5A5
SLC7A2
SLC9A1
SLC9A2
SLC9A3
SLC9A3R2
SLK
SMAD1
SMAD2
SMAD3
SMAD4
SMAD5
SMAD6
SMAD7
SMAD9
SMAP2
SMARCA2
SMARCB1
SMG1
SMPD2
SMURF2
SNAPC5
SNIP1
SNRK
SNRPN
SNTA1
SOCS1
SOCS2
SOCS3
SOCS6
SORBS1
SORL1
SOS1
SOS2
SOX10
SOX8
SP1
SP100
SP110
SP3
SPEG
SPI1
SPN
SPP1
SPRY1
SPRY2
SPRY4
SPTA1
SPTAN1
SQSTM1
SRC
SRCRB4D
SRD5A2
SREBF1
SREBF2
SRF
SRMS
SRP54
SRPK1
SRPK2
SRPK3
SSH1
SSH2
SSR2
SST
STAB2
STAP1
STAP2
STARD9
STAT1
STAT2
STAT4
STAT5A
STAT5B
STAT6
STIP1
STK10
STK11
STK16
STK17A
STK17B
STK24
STK25
STK3
STK31
STK32A
STK32B
STK32C
STK33
STK35
STK36
STK38
STK38L
STK4
STK40
SUMO1
SUPT3H
SYK
SYT1
T
TADA2A
TAF10
TAF12
TAF1B
TAF9
TANK
TAOK1
TAOK2
TAOK3
TAP1
TAP2
TAPBP
TBC1D15
TBC1D2
TBK1
TBP
TBX15
TBX18
TBX19
TBX2
TBX21
TBX3
TBX5
TBX6
TBXAS1
TCF12
TCF3
TCF4
TCFL5
TCL1A
TDP2
TEC
TEF
TEK
TENC1
TEP1
TERT
TESK1
TESK2
TF
TFAP4
TFDP1
TFEB
TFEC
TFRC
TGFA
TGFB1
TGFB2
TGFB3
TGFBR1
THBD
THBS1
THBS2
THPO
THY1
TIAM1
TIE1
TIMM17A
TIMM17B
TIMM22
TIMP1
TK1
TLE1
TLE4
TLK1
TLK2
TLR1
TLR2
TLR3
TLR4
TLR5
TLR6
TLR7
TLX1
TMPRSS13
TMPRSS15
TMPRSS2
TMPRSS3
TMPRSS4
TMPRSS5
TNC
TNF
TNFRSF10B
TNFRSF10C
TNFRSF11A
TNFRSF11B
TNFRSF13B
TNFRSF13C
TNFRSF14
TNFRSF17
TNFRSF18
TNFRSF19
TNFRSF1B
TNFRSF21
TNFRSF25
TNFRSF4
TNFRSF8
TNFRSF9
TNFSF10
TNFSF11
TNFSF12-TNFSF13
TNFSF13B
TNFSF15
TNFSF18
TNFSF4
TNFSF8
TNFSF9
TNIK
TNIP1
TNK1
TNK2
TNN
TNNI3K
TNR
TNXB
TOB1
TOP1
TOP2A
TOP2B
TP53
TP53RK
TP73
TPI1
TPR
TRA
TRADD
TRAF1
TRAF2
TRAF3
TRAF3IP2
TRAF4
TRAF5
TRAF6
TRAP1
TRAPPC4
TRIM11
TRIM28
TRIO
TRMT61A
TRPM6
TRPM7
TRRAP
TSC2
TSFM
TSHR
TSLP
TSSK1A
TSSK2
TSSK3
TSSK4
TSSK6
TTBK1
TTBK2
TTK
TTN
TUBA1A
TUBA1B
TUBA3C
TUBA4A
TUBA8
TUBG1
TUBGCP2
TXK
TYK2
TYR
TYRO3
TYROBP
UBE2V1
UBR5
UBTF
UHMK1
ULBP1
ULBP2
ULBP3
ULK1
ULK2
ULK3
ULK4
UPK2
UQCRFS1
USP18
VAV1
VAV2
VAV3
VCAN
VDR
VEGFA
VIL1
VIP
VPS11
VRK1
VRK2
VRK3
VTCN1
VWF
WAS
WBSCR22
WDR4
WEE1
WEE2
WNK1
WNK2
WNK3
WNK4
WNT2B
WNT3A
WT1
XBP1
XIAP
XPNPEP1
XPO1
XRCC5
XRCC6
XYLT2
YBX1
YES1
YSK4
YY1
ZAP70
ZBTB17
ZFP36
ZNF281
ZNF467
ZNF749
